# Supplementary material for: Density functional theory studies of the mechanistic aspects of olefin metathesis reactions
Source: Royal Society of Chemistry journal article supplement (doi:10.1039/c002245d), 2010-01-01
Supplement: c002245d.pdf [file c002245d.pdf]

## Supporting Information

The optimized geometries (in Cartesian and internal coordinates, in Å), absolute energies (in hartrees) and symmetry point groups of all the structures reported in the paper. The structure labels correspond to those of Figures 1, 3, 5, 7, and 9.

### R1-Cr

| ATOM | Coordinates (Angstroms) |           |           |
|------|-------------------------|-----------|-----------|
|      | X                       | Y         | Z         |
| 1 Cr | 0.000000                | 0.000000  | 0.148813  |
| 2 Cl | 2.302956                | 0.000000  | 0.353783  |
| 3 Cl | 0.000000                | -1.886461 | -0.814677 |
| 4 Cl | 0.000000                | 1.886461  | -0.814677 |
| 5 Cl | -2.302956               | 0.000000  | 0.353783  |
| 6 C  | 0.000000                | 0.000000  | 1.904818  |
| 7 H  | 0.000000                | -0.935480 | 2.469384  |
| 8 H  | 0.000000                | 0.935480  | 2.469384  |

Point Group: C<sub>2v</sub> Number of degrees of freedom: 7

Energy is -1966.378887383

| Distance Matrix (Angstroms) |          |          |          |          |          |          |
|-----------------------------|----------|----------|----------|----------|----------|----------|
|                             | Cr( 1)   | Cl( 2)   | Cl( 3)   | Cl( 4)   | Cl( 5)   | C ( 6)   |
| Cl( 2)                      | 2.312059 |          |          |          |          |          |
| Cl( 3)                      | 2.118266 | 3.198068 |          |          |          |          |
| Cl( 4)                      | 2.118266 | 3.198068 | 3.772922 |          |          |          |
| Cl( 5)                      | 2.312059 | 4.605912 | 3.198068 | 3.198068 |          |          |
| C ( 6)                      | 1.756005 | 2.776565 | 3.309742 | 3.309742 | 2.776565 |          |
| H ( 7)                      | 2.502033 | 3.264122 | 3.418980 | 4.329944 | 3.264122 | 1.092638 |
| H ( 8)                      | 2.502033 | 3.264122 | 4.329944 | 3.418980 | 3.264122 | 1.092638 |
|                             |          | H ( 7)   |          |          |          |          |
| H ( 8)                      | 1.870961 |          |          |          |          |          |

### R2-Cr

| ATOM | Coordinates (Angstroms) |           |           |
|------|-------------------------|-----------|-----------|
|      | X                       | Y         | Z         |
| 1 Cr | -0.402782               | -0.019828 | 0.000000  |
| 2 Cl | 2.707349                | -0.203836 | 0.000000  |
| 3 Cl | -1.289703               | -0.613850 | -1.821759 |
| 4 Cl | -0.132923               | 2.088829  | 0.000000  |
| 5 Cl | -1.289703               | -0.613850 | 1.821759  |
| 6 C  | 1.227891                | -1.183983 | 0.000000  |
| 7 H  | 1.192046                | -1.797115 | 0.901233  |
| 8 H  | 1.192046                | -1.797115 | -0.901233 |

Point Group: C<sub>s</sub> Number of degrees of freedom: 11

Energy is -1966.434393933

Distance Matrix (Angstroms)

|        | Cr( 1)   | Cl( 2)   | Cl( 3)   | Cl( 4)   | Cl( 5)   | C ( 6)   |
|--------|----------|----------|----------|----------|----------|----------|
| Cl( 2) | 3.115570 |          |          |          |          |          |
| Cl( 3) | 2.111468 | 4.411728 |          |          |          |          |
| Cl( 4) | 2.125855 | 3.650131 | 3.458529 |          |          |          |
| Cl( 5) | 2.111468 | 4.411728 | 3.643518 | 3.458529 |          |          |
| C ( 6) | 2.003585 | 1.774679 | 3.159452 | 3.544448 | 3.159452 |          |
| H ( 7) | 2.552342 | 2.376321 | 3.869610 | 4.203371 | 2.899408 | 1.090613 |
| H ( 8) | 2.552342 | 2.376321 | 2.899408 | 4.203371 | 3.869610 | 1.090613 |
| H ( 7) |          |          |          |          |          |          |
| H ( 8) | 1.802465 |          |          |          |          |          |

### **R3-Cr**

Coordinates (Angstroms)

| ATOM | X         | Y         | Z         |
|------|-----------|-----------|-----------|
| 1 Cr | 0.000000  | 0.000000  | 0.566060  |
| 2 Cl | 1.893166  | 0.000000  | 1.695274  |
| 3 Cl | -1.893166 | 0.000000  | 1.695274  |
| 4 Cl | 0.000000  | 1.464207  | -1.462672 |
| 5 Cl | 0.000000  | -1.464207 | -1.462672 |
| 6 C  | 0.000000  | 0.000000  | -2.537648 |
| 7 H  | -0.910101 | 0.000000  | -3.134009 |
| 8 H  | 0.910101  | 0.000000  | -3.134009 |

Point Group: C<sub>2v</sub> Number of degrees of freedom: 7

Energy is -1966.404774410

Distance Matrix (Angstroms)

|        | Cr( 1)   | Cl( 2)   | Cl( 3)   | Cl( 4)   | Cl( 5)   | C ( 6)   |
|--------|----------|----------|----------|----------|----------|----------|
| Cl( 2) | 2.204359 |          |          |          |          |          |
| Cl( 3) | 2.204359 | 3.786332 |          |          |          |          |
| Cl( 4) | 2.501931 | 3.962399 | 3.962399 |          |          |          |
| Cl( 5) | 2.501931 | 3.962399 | 3.962399 | 2.928414 |          |          |
| C ( 6) | 3.103708 | 4.636993 | 4.636993 | 1.816446 | 1.816446 |          |
| H ( 7) | 3.810354 | 5.583930 | 4.928325 | 2.401157 | 2.401157 | 1.088086 |
| H ( 8) | 3.810354 | 4.928325 | 5.583930 | 2.401157 | 2.401157 | 1.088086 |
| H ( 7) |          |          |          |          |          |          |
| H ( 8) | 1.820202 |          |          |          |          |          |

### **Ethylene**

Coordinates (Angstroms)

| ATOM | X         | Y         | Z        |
|------|-----------|-----------|----------|
| 1 H  | 1.240641  | -0.922990 | 0.000000 |
| 2 C  | 0.665417  | 0.000000  | 0.000000 |
| 3 C  | -0.665417 | 0.000000  | 0.000000 |
| 4 H  | 1.240641  | 0.922990  | 0.000000 |
| 5 H  | -1.240641 | -0.922990 | 0.000000 |
| 6 H  | -1.240641 | 0.922990  | 0.000000 |

Point Group: D<sub>2h</sub> Number of degrees of freedom: 3

Energy is -78.587447729

Distance Matrix (Angstroms)  
H ( 1) C ( 2) C ( 3) H ( 4) H ( 5)  
C ( 2) 1.087562  
C ( 3) 2.117774 1.330835  
H ( 4) 1.845980 1.087562 2.117774  
H ( 5) 2.481281 2.117774 1.087562 3.092636  
H ( 6) 3.092636 2.117774 1.087562 2.481281 1.845980

## p1-Cr

Coordinates (Angstroms)  
ATOM X Y Z  
1 Cr -0.295118 0.000336 -0.077082  
2 C 1.365239 0.000524 -1.324347  
3 H 1.421109 0.922501 -1.891751  
4 H 1.421670 -0.921266 -1.892034  
5 Cl 2.510679 0.000356 0.018981  
6 Cl -2.345301 0.000176 -0.623082  
7 Cl -0.053191 2.266403 -0.310740  
8 Cl -0.052787 -2.266198 -0.312265  
9 C -0.308282 -0.683017 2.134758  
10 H 0.606025 -1.255280 2.244785  
11 H -1.234092 -1.248992 2.164541  
12 C -0.308847 0.679973 2.135165  
13 H 0.605123 1.252885 2.245826  
14 H -1.235473 1.244656 2.165950

Point Group: C<sub>1</sub> Number of degrees of freedom: 36

Energy is -2045.018131456

Distance Matrix (Angstroms)  
Cr( 1) C ( 2) H ( 3) H ( 4) Cl( 5) Cl( 6)  
C ( 2) 2.076645  
H ( 3) 2.662489 1.084024  
H ( 4) 2.662848 1.084043 1.843766  
Cl( 5) 2.807441 1.765379 2.385038 2.384807  
Cl( 6) 2.121642 3.776225 4.079957 4.080363 4.898243  
Cl( 7) 2.290891 2.858942 2.545433 3.851874 3.437603 3.238381  
Cl( 8) 2.291552 2.858870 3.851616 2.545297 3.437783 3.238622  
C ( 9) 2.315033 3.902987 4.667039 4.389140 3.590272 3.495980  
H ( 10) 2.789211 3.859036 4.745316 4.229671 3.187246 4.302459  
H ( 11) 2.732649 4.526605 5.312154 4.859658 4.493063 3.250546  
C ( 12) 2.314331 3.902875 4.389489 4.666581 3.590242 3.495310  
H ( 13) 2.788407 3.859057 4.230192 4.745057 3.187289 4.301733  
H ( 14) 2.731994 4.527001 4.860673 5.312142 4.493485 3.249483  
Cl( 7) Cl( 8) C ( 9) H ( 10) H ( 11) C ( 12)  
Cl( 8) 4.532601  
C ( 9) 3.839871 2.925689  
H ( 10) 4.400855 2.827453 1.084227  
H ( 11) 4.458649 2.926560 1.085513 1.841876  
C ( 12) 2.926528 3.838671 1.362990 2.143411 2.139591  
H ( 13) 2.827830 4.400070 2.143447 2.508166 3.106237 1.084350  
H ( 14) 2.928438 4.457172 2.139294 3.105963 2.493648 1.085564  
H ( 13)  
H ( 14) 1.842347

## TS1-Cr

| ATOM | Coordinates (Angstroms) |           |           |
|------|-------------------------|-----------|-----------|
|      | X                       | Y         | Z         |
| 1 Cr | 0.148630                | 0.046957  | 0.184932  |
| 2 Cl | 2.086776                | -0.955537 | -0.229401 |
| 3 Cl | 1.029415                | 1.939211  | 0.718756  |
| 4 Cl | -2.169727               | 0.485889  | 0.535502  |
| 5 Cl | -0.426995               | 0.865871  | -1.895889 |
| 6 C  | -0.185691               | -0.706972 | 1.807046  |
| 7 H  | 0.768495                | -0.895714 | 2.315671  |
| 8 H  | -1.081106               | -0.869375 | 2.396735  |
| 9 C  | -0.714614               | -1.934135 | -0.965707 |
| 10 H | 0.105301                | -2.081482 | -1.656783 |
| 11 H | -1.652055               | -1.575011 | -1.371542 |
| 12 C | -0.646044               | -2.377675 | 0.339615  |
| 13 H | -1.567484               | -2.456056 | 0.908551  |
| 14 H | 0.224217                | -2.929402 | 0.683392  |

Point Group: C<sub>1</sub> Number of degrees of freedom: 36

Energy is -2044.954388231

| Distance Matrix (Angstroms) |          |          |          |          |          |          |
|-----------------------------|----------|----------|----------|----------|----------|----------|
|                             | Cr( 1)   | Cl( 2)   | Cl( 3)   | Cl( 4)   | Cl( 5)   | C ( 6)   |
| Cl( 2)                      | 2.221053 |          |          |          |          |          |
| Cl( 3)                      | 2.154385 | 3.224373 |          |          |          |          |
| Cl( 4)                      | 2.385444 | 4.558575 | 3.518556 |          |          |          |
| Cl( 5)                      | 2.309065 | 3.523316 | 3.179553 | 3.015488 |          |          |
| C ( 6)                      | 1.819735 | 3.061537 | 3.108560 | 2.641238 | 4.030359 |          |
| H ( 7)                      | 2.410998 | 2.866851 | 3.264202 | 3.702834 | 4.719070 | 1.097632 |
| H ( 8)                      | 2.691466 | 4.115761 | 3.893337 | 2.546767 | 4.676063 | 1.084378 |
| C ( 9)                      | 2.448242 | 3.057382 | 4.569668 | 3.198046 | 2.964456 | 3.077962 |
| H ( 10)                     | 2.814968 | 2.689129 | 4.760583 | 4.071027 | 3.004564 | 3.737923 |
| H ( 11)                     | 2.880253 | 3.958168 | 4.889722 | 2.855190 | 2.780939 | 3.606540 |
| C ( 12)                     | 2.556223 | 3.132820 | 4.646118 | 3.249612 | 3.945384 | 2.270799 |
| H ( 13)                     | 3.119895 | 4.110974 | 5.108647 | 3.026037 | 4.494530 | 2.403318 |
| H ( 14)                     | 3.018756 | 2.863295 | 4.934874 | 4.173374 | 4.634746 | 2.523849 |
| H ( 7)                      |          | H ( 8)   | C ( 9)   | H ( 10)  | H ( 11)  | C ( 12)  |
| H ( 8)                      | 1.851565 |          |          |          |          |          |
| C ( 9)                      | 3.747716 | 3.545990 |          |          |          |          |
| H ( 10)                     | 4.198365 | 4.394061 | 1.082385 |          |          |          |
| H ( 11)                     | 4.462740 | 3.876056 | 1.082805 | 1.850993 |          |          |
| C ( 12)                     | 2.846389 | 2.587661 | 1.380324 | 2.153567 | 2.141117 |          |
| H ( 13)                     | 3.141887 | 2.229083 | 2.124295 | 3.085361 | 2.445856 | 1.085764 |
| H ( 14)                     | 2.663918 | 2.980456 | 2.142776 | 2.491893 | 3.094758 | 1.086250 |
| H ( 13)                     |          |          |          |          |          |          |
| H ( 14)                     | 1.866801 |          |          |          |          |          |

## pdt1-Cr

| ATOM | Coordinates (Angstroms) |           |           |
|------|-------------------------|-----------|-----------|
|      | X                       | Y         | Z         |
| 1 Cr | 0.282480                | 0.073847  | 0.000000  |
| 2 Cl | 0.433170                | -2.139825 | 0.000000  |
| 3 Cl | 1.105910                | 0.221197  | 2.039102  |
| 4 Cl | -0.384484               | 2.182519  | 0.000000  |
| 5 Cl | 1.105910                | 0.221197  | -2.039102 |
| 6 C  | -1.559153               | -0.282310 | 1.194356  |
| 7 H  | -1.326461               | -1.154965 | 1.794201  |
| 8 H  | -1.682019               | 0.623525  | 1.777880  |
| 9 C  | -1.559153               | -0.282310 | -1.194356 |
| 10 H | -1.326461               | -1.154965 | -1.794201 |
| 11 H | -1.682019               | 0.623525  | -1.777880 |
| 12 C | -2.464029               | -0.475182 | 0.000000  |
| 13 H | -3.270255               | 0.267405  | 0.000000  |
| 14 H | -2.893732               | -1.483042 | 0.000000  |

Point Group: C<sub>s</sub> Number of degrees of freedom: 21

Energy is -2044.984558072

| Distance Matrix (Angstroms) |          |          |          |          |          |          |
|-----------------------------|----------|----------|----------|----------|----------|----------|
|                             | Cr( 1)   | Cl( 2)   | Cl( 3)   | Cl( 4)   | Cl( 5)   | C ( 6)   |
| Cl( 2)                      | 2.218796 |          |          |          |          |          |
| Cl( 3)                      | 2.204016 | 3.191386 |          |          |          |          |
| Cl( 4)                      | 2.211637 | 4.399002 | 3.197811 |          |          |          |
| Cl( 5)                      | 2.204016 | 3.191386 | 4.078205 | 3.197811 |          |          |
| C ( 6)                      | 2.223724 | 2.974257 | 2.840718 | 2.980220 | 4.220348 |          |
| H ( 7)                      | 2.705148 | 2.699150 | 2.805392 | 3.904519 | 4.743887 | 1.084199 |
| H ( 8)                      | 2.705967 | 3.907811 | 2.828896 | 2.697205 | 4.743814 | 1.084497 |
| C ( 9)                      | 2.223724 | 2.974257 | 4.220348 | 2.980220 | 2.840718 | 2.388711 |
| H ( 10)                     | 2.705148 | 2.699150 | 4.743887 | 3.904519 | 2.805392 | 3.122041 |
| H ( 11)                     | 2.705967 | 3.907811 | 4.743814 | 2.697205 | 2.828896 | 3.109633 |
| C ( 12)                     | 2.800848 | 3.341378 | 4.169814 | 3.374593 | 4.169814 | 1.510790 |
| H ( 13)                     | 3.558005 | 4.417027 | 4.828136 | 3.463428 | 4.828136 | 2.157902 |
| H ( 14)                     | 3.537263 | 3.391113 | 4.802032 | 4.442146 | 4.802032 | 2.156234 |
|                             | H ( 7)   | H ( 8)   | C ( 9)   | H ( 10)  | H ( 11)  | C ( 12)  |
| H ( 8)                      | 1.813757 |          |          |          |          |          |
| C ( 9)                      | 3.122041 | 3.109633 |          |          |          |          |
| H ( 10)                     | 3.588402 | 4.006146 | 1.084199 |          |          |          |
| H ( 11)                     | 4.006146 | 3.555759 | 1.084497 | 1.813757 |          |          |
| C ( 12)                     | 2.230543 | 2.231491 | 1.510790 | 2.230543 | 2.231491 |          |
| H ( 13)                     | 3.003437 | 2.410430 | 2.157902 | 3.003437 | 2.410430 | 1.096101 |
| H ( 14)                     | 2.404814 | 3.011101 | 2.156234 | 2.404814 | 3.011101 | 1.095640 |
|                             | H ( 13)  |          |          |          |          |          |
| H ( 14)                     | 1.790485 |          |          |          |          |          |

## TS2-Cr

| Coordinates (Angstroms) |           |           |           |
|-------------------------|-----------|-----------|-----------|
| ATOM                    | X         | Y         | Z         |
| 1 Cl                    | -1.374037 | -1.598068 | -0.135754 |
| 2 C                     | -3.222890 | 0.550796  | 0.176061  |
| 3 H                     | -3.392639 | 0.042790  | 1.119607  |
| 4 H                     | -3.490505 | 0.006794  | -0.721529 |
| 5 C                     | -2.738502 | 1.823805  | 0.122863  |
| 6 H                     | -2.747743 | 2.362202  | -0.820278 |
| 7 H                     | -2.702912 | 2.430471  | 1.022593  |
| 8 C                     | -0.603836 | 1.458369  | 0.192642  |
| 9 H                     | -0.525317 | 2.184243  | -0.611901 |
| 10 H                    | -0.563057 | 1.868842  | 1.199270  |
| 11 Cr                   | 0.350939  | -0.150478 | -0.025261 |
| 12 Cl                   | 0.926971  | -0.534302 | -2.034352 |
| 13 Cl                   | 1.033826  | -1.042484 | 1.791646  |
| 14 Cl                   | 2.024475  | 1.511226  | 0.170760  |

Point Group: C<sub>1</sub> Number of degrees of freedom: 36

Energy is -2044.971282245

| Distance Matrix (Angstroms) |          |          |          |          |          |          |
|-----------------------------|----------|----------|----------|----------|----------|----------|
|                             | Cl ( 1)  | C ( 2)   | H ( 3)   | H ( 4)   | C ( 5)   | H ( 6)   |
| C ( 2)                      | 2.851859 |          |          |          |          |          |
| H ( 3)                      | 2.888442 | 1.084972 |          |          |          |          |
| H ( 4)                      | 2.719954 | 1.083154 | 1.844086 |          |          |          |
| C ( 5)                      | 3.692947 | 1.363090 | 2.143223 | 2.140101 |          |          |
| H ( 6)                      | 4.247279 | 2.121238 | 3.091718 | 2.471719 | 1.086036 |          |
| H ( 7)                      | 4.397363 | 2.126070 | 2.487198 | 3.088118 | 1.085737 | 1.844680 |
| C ( 8)                      | 3.169047 | 2.771897 | 3.261986 | 3.357921 | 2.166844 | 2.537570 |
| H ( 9)                      | 3.905498 | 3.250528 | 3.975610 | 3.680440 | 2.359657 | 2.239256 |
| H ( 10)                     | 3.802557 | 3.139891 | 3.368582 | 3.965683 | 2.427600 | 3.015764 |
| Cr( 11)                     | 2.254610 | 3.647543 | 3.919497 | 3.907201 | 3.669384 | 4.067855 |
| Cl( 12)                     | 3.167162 | 4.825424 | 5.379547 | 4.640085 | 4.863121 | 4.833967 |
| Cl( 13)                     | 3.133903 | 4.823722 | 4.606848 | 5.280777 | 5.023038 | 5.719642 |
| Cl( 14)                     | 4.616443 | 5.334538 | 5.692252 | 5.785715 | 4.773463 | 4.947765 |
|                             | H ( 7)   | C ( 8)   | H ( 9)   | H ( 10)  | Cr( 11)  | Cl( 12)  |
| C ( 8)                      | 2.457625 |          |          |          |          |          |
| H ( 9)                      | 2.733883 | 1.086437 |          |          |          |          |
| H ( 10)                     | 2.219374 | 1.087865 | 1.838815 |          |          |          |
| Cr( 11)                     | 4.133437 | 1.883472 | 2.561814 | 2.532295 |          |          |
| Cl( 12)                     | 5.595609 | 3.357619 | 3.394554 | 4.295532 | 2.124989 |          |
| Cl( 13)                     | 5.159076 | 3.390135 | 4.315058 | 3.372946 | 2.136155 | 3.861078 |
| Cl( 14)                     | 4.890687 | 2.628933 | 2.750809 | 2.807320 | 2.366518 | 3.201752 |
|                             | Cl( 13)  |          |          |          |          |          |
| Cl( 14)                     | 3.182780 |          |          |          |          |          |

## **pdt2-Cr**

| ATOM  | Coordinates (Angstroms) |           |           |
|-------|-------------------------|-----------|-----------|
|       | X                       | Y         | Z         |
| 1 Cl  | -2.743254               | -0.445581 | 0.639108  |
| 2 C   | -2.672509               | 0.150576  | -1.075170 |
| 3 H   | -3.682551               | 0.486159  | -1.315604 |
| 4 H   | -2.429556               | -0.715390 | -1.695730 |
| 5 C   | -1.672911               | 1.287154  | -1.261681 |
| 6 H   | -1.923944               | 1.767042  | -2.222763 |
| 7 H   | -1.829612               | 2.050576  | -0.491156 |
| 8 C   | -0.199285               | 0.920061  | -1.331432 |
| 9 H   | 0.013726                | 0.107672  | -2.056132 |
| 10 H  | 0.422414                | 1.785875  | -1.586048 |
| 11 Cr | 0.808887                | -0.028756 | 0.042193  |
| 12 Cl | 0.432209                | -2.120878 | 0.117239  |
| 13 Cl | 2.830651                | 0.174555  | -0.651698 |
| 14 Cl | 0.477463                | 1.283908  | 1.658286  |

Point Group: C<sub>1</sub> Number of degrees of freedom: 36

Energy is -2045.069618158

| Distance Matrix (Angstroms) |          |          |          |          |          |          |
|-----------------------------|----------|----------|----------|----------|----------|----------|
|                             | Cl ( 1)  | C ( 2)   | H ( 3)   | H ( 4)   | C ( 5)   | H ( 6)   |
| C ( 2)                      | 1.816359 |          |          |          |          |          |
| H ( 3)                      | 2.360364 | 1.091151 |          |          |          |          |
| H ( 4)                      | 2.371218 | 1.092711 | 1.777136 |          |          |          |
| C ( 5)                      | 2.785858 | 1.525055 | 2.164060 | 2.184283 |          |          |
| H ( 6)                      | 3.709080 | 2.119029 | 2.357180 | 2.587639 | 1.103172 |          |
| H ( 7)                      | 2.888432 | 2.159063 | 2.561347 | 3.075956 | 1.095937 | 1.757200 |
| C ( 8)                      | 3.495681 | 2.602809 | 3.510223 | 2.789538 | 1.520262 | 2.118088 |
| H ( 9)                      | 3.895042 | 2.860068 | 3.788681 | 2.603257 | 2.206144 | 2.556529 |
| H ( 10)                     | 4.466786 | 3.537478 | 4.314295 | 3.795009 | 2.178147 | 2.431287 |
| Cr( 11)                     | 3.625984 | 3.660708 | 4.720357 | 3.738898 | 3.096938 | 3.977849 |
| Cl( 12)                     | 3.628021 | 4.027482 | 5.077492 | 3.667690 | 4.236464 | 5.113021 |
| Cl( 13)                     | 5.754926 | 5.519482 | 6.554363 | 5.436155 | 4.678892 | 5.254564 |
| Cl( 14)                     | 3.795111 | 4.321869 | 5.175533 | 4.867995 | 3.626338 | 4.589413 |
| H ( 7)                      |          | C ( 8)   | H ( 9)   | H ( 10)  | Cr( 11)  | Cl( 12)  |
| C ( 8)                      |          | 2.154552 |          |          |          |          |
| H ( 9)                      |          | 3.101923 | 1.109297 |          |          |          |
| H ( 10)                     |          | 2.518031 | 1.095889 | 1.790075 |          |          |
| Cr( 11)                     |          | 3.401435 | 1.950259 | 2.248080 | 2.468484 |          |
| Cl( 12)                     |          | 4.784037 | 3.427060 | 3.140876 | 4.261925 | 2.127086 |
| Cl( 13)                     |          | 5.026260 | 3.193483 | 3.148329 | 3.044498 | 2.147172 |
| Cl( 14)                     |          | 3.245069 | 3.086873 | 3.923708 | 3.283399 | 2.108242 |
| Cl( 13)                     |          |          |          |          |          | 3.737572 |
| Cl( 14)                     |          |          |          |          |          | 3.479107 |

## **TS3-Cr**

| ATOM | Coordinates (Angstroms) |           |           |
|------|-------------------------|-----------|-----------|
|      | X                       | Y         | Z         |
| 1 Cr | 0.585199                | 0.003313  | -0.222090 |
| 2 Cl | 1.487610                | 1.834062  | 0.368931  |
| 3 Cl | 1.491166                | -1.835187 | 0.338659  |
| 4 Cl | -0.868477               | 0.014201  | -1.899458 |
| 5 Cl | -1.515113               | -0.009670 | 1.333890  |
| 6 C  | -2.919336               | -0.005837 | 0.450555  |
| 7 H  | -3.305814               | -0.956225 | 0.109900  |
| 8 H  | -3.308727               | 0.947810  | 0.122669  |

Point Group: C<sub>1</sub> Number of degrees of freedom: 18

Energy is -1966.362913047

Distance Matrix (Angstroms)

|        | Cr( 1)   | Cl( 2)   | Cl( 3)   | Cl( 4)   | Cl( 5)   | C ( 6)   |
|--------|----------|----------|----------|----------|----------|----------|
| Cl( 2) | 2.124922 |          |          |          |          |          |
| Cl( 3) | 2.124922 | 3.669375 |          |          |          |          |
| Cl( 4) | 2.219652 | 3.742810 | 3.741299 |          |          |          |
| Cl( 5) | 2.613915 | 3.653332 | 3.655230 | 3.297460 |          |          |
| C ( 6) | 3.568515 | 4.776302 | 4.776146 | 3.119132 | 1.658957 |          |
| H ( 7) | 4.021307 | 5.552451 | 4.882204 | 3.304521 | 2.366585 | 1.081040 |
| H ( 8) | 4.021640 | 4.883742 | 5.552539 | 3.303852 | 2.366616 | 1.081007 |
|        |          | H ( 7)   |          |          |          |          |
| H ( 8) | 1.904080 |          |          |          |          |          |

### **R1-Mo**

Coordinates (Angstroms)

| ATOM | X         | Y         | Z         |
|------|-----------|-----------|-----------|
| 1 Mo | 0.000000  | 0.000000  | 0.169456  |
| 2 Cl | 2.380303  | 0.000000  | -0.054973 |
| 3 Cl | 0.000000  | -2.112168 | -0.664127 |
| 4 Cl | 0.000000  | 2.112168  | -0.664127 |
| 5 Cl | -2.380303 | 0.000000  | -0.054973 |
| 6 C  | 0.000000  | 0.000000  | 2.025767  |
| 7 H  | 0.000000  | -0.937257 | 2.588838  |
| 8 H  | 0.000000  | 0.937257  | 2.588838  |

Point Group: C<sub>2v</sub> Number of degrees of freedom: 7

Energy is -1947.702885268

Distance Matrix (Angstroms)

|        | Mo( 1)   | Cl( 2)   | Cl( 3)   | Cl( 4)   | Cl( 5)   | C ( 6)   |
|--------|----------|----------|----------|----------|----------|----------|
| Cl( 2) | 2.390860 |          |          |          |          |          |
| Cl( 3) | 2.270708 | 3.240088 |          |          |          |          |
| Cl( 4) | 2.270708 | 3.240088 | 4.224337 |          |          |          |
| Cl( 5) | 2.390860 | 4.760607 | 3.240088 | 3.240088 |          |          |
| C ( 6) | 1.856312 | 3.161539 | 3.420057 | 3.420057 | 3.161539 |          |
| H ( 7) | 2.594583 | 3.678863 | 3.458642 | 4.458787 | 3.678863 | 1.093389 |
| H ( 8) | 2.594583 | 3.678863 | 4.458787 | 3.458642 | 3.678863 | 1.093389 |
|        |          | H ( 7)   |          |          |          |          |
| H ( 8) | 1.874515 |          |          |          |          |          |

### **R4-Mo**

Coordinates (Angstroms)

| ATOM | X         | Y         | Z         |
|------|-----------|-----------|-----------|
| 1 Mo | 0.052746  | 0.205328  | 0.000000  |
| 2 Cl | -2.234299 | -0.010639 | 0.000000  |
| 3 Cl | 0.926900  | 0.314083  | -2.094351 |
| 4 Cl | 0.271240  | -2.209161 | 0.000000  |
| 5 Cl | 0.926900  | 0.314083  | 2.094351  |
| 6 C  | -0.022762 | 2.152716  | 0.000000  |
| 7 H  | -0.055669 | 2.758734  | 0.909874  |
| 8 H  | -0.055669 | 2.758734  | -0.909874 |

Point Group: C<sub>s</sub> Number of degrees of freedom: 11

Energy is -1947.682401258



Distance Matrix (Angstroms)

|        | Mo( 1)   | Cl( 2)   | Cl( 3)   | Cl( 4)   | Cl( 5)   | C ( 6)   |
|--------|----------|----------|----------|----------|----------|----------|
| Cl( 2) | 2.297219 |          |          |          |          |          |
| Cl( 3) | 2.272065 | 3.805907 |          |          |          |          |
| Cl( 4) | 2.424354 | 3.333350 | 3.344093 |          |          |          |
| Cl( 5) | 2.272065 | 3.805907 | 4.188702 | 3.344093 |          |          |
| C ( 6) | 1.948852 | 3.093703 | 2.944271 | 4.371774 | 2.944271 |          |
| H ( 7) | 2.712842 | 3.639193 | 3.995889 | 5.061099 | 2.888727 | 1.093715 |
| H ( 8) | 2.712842 | 3.639193 | 2.888727 | 5.061099 | 3.995889 | 1.093715 |
| H ( 7) |          |          |          |          |          |          |
| H ( 8) | 1.819749 |          |          |          |          |          |

## **R2-Mo**

Coordinates (Angstroms)

| ATOM | X         | Y         | Z         |
|------|-----------|-----------|-----------|
| 1 Mo | -0.466268 | -0.053487 | 0.000000  |
| 2 Cl | 2.887555  | -0.354043 | 0.000000  |
| 3 Cl | -1.286302 | -0.496932 | -2.047443 |
| 4 Cl | 0.234652  | 2.117551  | 0.000000  |
| 5 Cl | -1.286302 | -0.496932 | 2.047443  |
| 6 C  | 1.286220  | -1.194079 | 0.000000  |
| 7 H  | 1.261350  | -1.836521 | 0.888122  |
| 8 H  | 1.261350  | -1.836521 | -0.888122 |

Point Group: C<sub>s</sub> Number of degrees of freedom: 11

Energy is -1947.690641634

Distance Matrix (Angstroms)

|        | Mo( 1)   | Cl( 2)   | Cl( 3)   | Cl( 4)   | Cl( 5)   | C ( 6)   |
|--------|----------|----------|----------|----------|----------|----------|
| Cl( 2) | 3.367264 |          |          |          |          |          |
| Cl( 3) | 2.249693 | 4.651185 |          |          |          |          |
| Cl( 4) | 2.281380 | 3.625834 | 3.652512 |          |          |          |
| Cl( 5) | 2.249693 | 4.651185 | 4.094885 | 3.652512 |          |          |
| C ( 6) | 2.090972 | 1.808296 | 3.360939 | 3.474577 | 3.360939 |          |
| H ( 7) | 2.636785 | 2.372982 | 4.111274 | 4.180616 | 3.103072 | 1.096408 |
| H ( 8) | 2.636785 | 2.372982 | 3.103072 | 4.180616 | 4.111274 | 1.096408 |
| H ( 7) |          |          |          |          |          |          |
| H ( 8) | 1.776244 |          |          |          |          |          |

## **p1-Mo**

Coordinates (Angstroms)

| ATOM | X         | Y         | Z         |
|------|-----------|-----------|-----------|
| 1 Mo | -0.258101 | -0.000148 | -0.025783 |
| 2 C  | 1.446856  | 0.000328  | -1.365347 |
| 3 H  | 1.569013  | 0.917503  | -1.934464 |
| 4 H  | 1.569911  | -0.917030 | -1.933956 |
| 5 Cl | 2.564460  | 0.001210  | 0.040996  |
| 6 Cl | -2.455698 | -0.001297 | -0.505533 |
| 7 Cl | -0.010113 | 2.369053  | -0.372149 |
| 8 Cl | -0.007559 | -2.369133 | -0.371608 |
| 9 C  | -0.156724 | -0.706211 | 2.059441  |
| 10 H | 0.754399  | -1.270401 | 2.233634  |
| 11 H | -1.072666 | -1.261517 | 2.252400  |
| 12 C | -0.157880 | 0.707020  | 2.059299  |
| 13 H | 0.752254  | 1.272835  | 2.233498  |
| 14 H | -1.074684 | 1.260862  | 2.252429  |

Point Group: C<sub>1</sub> Number of degrees of freedom: 36

Energy is -2026.314240052

Distance Matrix (Angstroms)

|         | Mo( 1)   | C ( 2)   | H ( 3)   | H ( 4)   | Cl( 5)   | Cl( 6)   |
|---------|----------|----------|----------|----------|----------|----------|
| C ( 2)  | 2.168250 |          |          |          |          |          |
| H ( 3)  | 2.797050 | 1.086290 |          |          |          |          |
| H ( 4)  | 2.797038 | 1.086280 | 1.834533 |          |          |          |
| Cl( 5)  | 2.823352 | 1.796341 | 2.394358 | 2.394312 |          |          |
| Cl( 6)  | 2.249354 | 3.996150 | 4.368562 | 4.368580 | 5.049821 |          |
| Cl( 7)  | 2.407193 | 2.952974 | 2.653575 | 3.966618 | 3.522187 | 3.408407 |
| Cl( 8)  | 2.407168 | 2.952488 | 3.966116 | 2.652913 | 3.521939 | 3.408515 |
| C ( 9)  | 2.203852 | 3.847056 | 4.643909 | 4.355793 | 3.461128 | 3.515861 |
| H ( 10) | 2.782745 | 3.879035 | 4.777401 | 4.261307 | 3.114639 | 4.406630 |
| H ( 11) | 2.728495 | 4.585666 | 5.408920 | 4.962606 | 4.439985 | 3.332736 |
| C ( 12) | 2.204019 | 3.847439 | 4.356214 | 4.644231 | 3.461625 | 3.515686 |
| H ( 13) | 2.783102 | 3.879875 | 4.262072 | 4.778257 | 3.115796 | 4.406434 |
| H ( 14) | 2.728957 | 4.586438 | 4.963577 | 5.409520 | 4.440780 | 3.332657 |
| Cl( 7)  |          | Cl( 8)   | C ( 9)   | H ( 10)  | H ( 11)  | C ( 12)  |
| Cl( 8)  |          | 4.738187 |          |          |          |          |
| C ( 9)  |          | 3.923184 | 2.949163 |          |          |          |
| H ( 10) |          | 4.540948 | 2.928323 | 1.085726 |          |          |
| H ( 11) |          | 4.604162 | 3.040836 | 1.088369 | 1.827183 |          |
| C ( 12) |          | 2.948920 | 3.923598 | 1.413231 | 2.184683 | 2.179279 |
| H ( 13) |          | 2.927848 | 4.541786 | 2.184756 | 2.543237 | 3.123080 |
| H ( 14) |          | 3.041350 | 4.604475 | 2.179282 | 3.123010 | 2.522380 |
|         |          |          |          |          |          | 1.088379 |
|         |          |          |          |          |          | H ( 13)  |
|         |          |          |          |          |          | H ( 14)  |
|         |          |          |          |          |          | 1.827075 |

## **TS1-Mo**

Coordinates (Angstroms)

| ATOM | X         | Y         | Z         |
|------|-----------|-----------|-----------|
| 1 Mo | 0.087131  | 0.015259  | 0.116380  |
| 2 Cl | 2.276674  | -0.645336 | -0.472636 |
| 3 Cl | 0.984888  | 1.971515  | 0.947232  |
| 4 Cl | -2.277279 | -0.086245 | 0.719370  |
| 5 Cl | -0.899634 | 1.334141  | -1.631789 |
| 6 C  | 0.035254  | -1.237652 | 1.635824  |
| 7 H  | 1.032541  | -1.516508 | 1.991886  |
| 8 H  | -0.789774 | -1.577219 | 2.252394  |
| 9 C  | -0.382071 | -1.710564 | -1.316903 |
| 10 H | 0.413033  | -1.755226 | -2.050360 |
| 11 H | -1.377118 | -1.504931 | -1.695118 |
| 12 C | -0.254681 | -2.431078 | -0.095865 |
| 13 H | -1.165892 | -2.800635 | 0.364345  |
| 14 H | 0.658743  | -2.992002 | 0.077366  |

Point Group: C<sub>1</sub> Number of degrees of freedom:36

Energy is -2026.281920802

Distance Matrix (Angstroms)

|        | Mo( 1)   | Cl( 2)   | Cl( 3)   | Cl( 4)   | Cl( 5)   | C( 6)    |
|--------|----------|----------|----------|----------|----------|----------|
| Cl( 2) | 2.361657 |          |          |          |          |          |
| Cl( 3) | 2.307211 | 3.245404 |          |          |          |          |
| Cl( 4) | 2.442198 | 4.740458 | 3.863681 |          |          |          |
| Cl( 5) | 2.401926 | 3.918022 | 3.257149 | 3.073003 |          |          |
| C( 6)  | 1.970072 | 3.133753 | 3.416828 | 2.741064 | 4.262091 |          |
| H( 7)  | 2.599544 | 2.894940 | 3.641412 | 3.823592 | 4.999052 | 1.095045 |
| H( 8)  | 2.804907 | 4.206816 | 4.176887 | 2.604963 | 4.855405 | 1.084498 |
| C( 9)  | 2.291924 | 2.986038 | 4.533497 | 3.221278 | 3.104392 | 3.019337 |
| H( 10) | 2.817018 | 2.682206 | 4.816761 | 4.206504 | 3.382674 | 3.741463 |
| H( 11) | 2.781462 | 3.947603 | 4.964551 | 2.941549 | 2.879641 | 3.627865 |
| C( 12) | 2.479203 | 3.120672 | 4.691206 | 3.202147 | 4.117268 | 2.122987 |
| H( 13) | 3.092056 | 4.146940 | 5.266785 | 2.954511 | 4.599110 | 2.345703 |
| H( 14) | 3.061352 | 2.902937 | 5.049707 | 4.180408 | 4.905635 | 2.428018 |
|        | H( 7)    | H( 8)    | C( 9)    | H( 10)   | H( 11)   | C( 12)   |
| H( 8)  | 1.841843 |          |          |          |          |          |
| C( 9)  | 3.603729 | 3.594980 |          |          |          |          |
| H( 10) | 4.096404 | 4.471255 | 1.082656 |          |          |          |
| H( 11) | 4.404610 | 3.991622 | 1.084182 | 1.842141 |          |          |
| C( 12) | 2.617648 | 2.555331 | 1.423482 | 2.173170 | 2.162226 |          |
| H( 13) | 3.021751 | 2.280995 | 2.151563 | 3.068661 | 2.442305 | 1.085666 |
| H( 14) | 2.445852 | 2.971625 | 2.160870 | 2.473298 | 3.081852 | 1.085813 |
|        | H( 13)   |          |          |          |          |          |
| H( 14) | 1.856952 |          |          |          |          |          |

### **pdt1-Mo**

Coordinates (Angstroms)

| ATOM | X         | Y         | Z         |
|------|-----------|-----------|-----------|
| 1 Mo | 0.178978  | 0.092463  | 0.000000  |
| 2 Cl | 0.886199  | -2.099659 | 0.000000  |
| 3 Cl | 0.925873  | 0.312974  | 2.222527  |
| 4 Cl | -0.420076 | 2.318505  | 0.000000  |
| 5 Cl | 0.925873  | 0.312974  | -2.222527 |
| 6 C  | -1.659595 | -0.533557 | 1.144978  |
| 7 H  | -1.356254 | -1.153536 | 1.987068  |
| 8 H  | -2.076580 | 0.413707  | 1.490654  |
| 9 C  | -1.659595 | -0.533557 | -1.144978 |
| 10 H | -1.356254 | -1.153536 | -1.987068 |
| 11 H | -2.076580 | 0.413707  | -1.490654 |
| 12 C | -2.401338 | -1.184799 | 0.000000  |
| 13 H | -3.482094 | -0.985144 | 0.000000  |
| 14 H | -2.249928 | -2.268658 | 0.000000  |

Point Group: C<sub>s</sub> Number of degrees of freedom: 21

Energy is -2026.309727837

Distance Matrix (Angstroms)

|        | Mo( 1)   | Cl( 2)   | Cl( 3)   | Cl( 4)   | Cl( 5)   | C( 6)    |
|--------|----------|----------|----------|----------|----------|----------|
| Cl( 2) | 2.303381 |          |          |          |          |          |
| Cl( 3) | 2.355017 | 3.280549 |          |          |          |          |
| Cl( 4) | 2.305239 | 4.607226 | 3.282280 |          |          |          |
| Cl( 5) | 2.355017 | 3.280549 | 4.445054 | 3.282280 |          |          |
| C( 6)  | 2.254601 | 3.200737 | 2.926153 | 3.313855 | 4.329128 |          |
| H( 7)  | 2.803193 | 3.142004 | 2.722903 | 4.108520 | 5.007939 | 1.088809 |
| H( 8)  | 2.722643 | 4.161384 | 3.092008 | 2.931605 | 4.776252 | 1.091181 |
| C( 9)  | 2.254601 | 3.200737 | 4.329128 | 3.313855 | 2.926153 | 2.289956 |
| H( 10) | 2.803193 | 3.142004 | 5.007939 | 4.108520 | 2.722903 | 3.207196 |
| H( 11) | 2.722643 | 4.161384 | 4.776252 | 2.931605 | 3.092008 | 2.831562 |
| C( 12) | 2.879137 | 3.412458 | 4.272386 | 4.024741 | 4.272386 | 1.511712 |
| H( 13) | 3.816371 | 4.508230 | 5.104402 | 4.504448 | 5.104402 | 2.199184 |
| H( 14) | 3.387399 | 3.140677 | 4.657270 | 4.938665 | 4.657270 | 2.161028 |
|        | H( 7)    | H( 8)    | C( 9)    | H( 10)   | H( 11)   | C( 12)   |
| H( 8)  | 1.794867 |          |          |          |          |          |
| C( 9)  | 3.207196 | 2.831562 |          |          |          |          |
| H( 10) | 3.974137 | 3.881967 | 1.088809 |          |          |          |
| H( 11) | 3.881967 | 2.981308 | 1.091181 | 1.794867 |          |          |
| C( 12) | 2.245355 | 2.209692 | 1.511712 | 2.245355 | 2.209692 |          |
| H( 13) | 2.914789 | 2.480787 | 2.199184 | 2.914789 | 2.480787 | 1.099044 |
| H( 14) | 2.447568 | 3.073626 | 2.161028 | 2.447568 | 3.073626 | 1.094383 |
|        | H( 13)   |          |          |          |          |          |
| H( 14) | 1.779225 |          |          |          |          |          |

## TS2-Mo

Coordinates (Angstroms)

| ATOM  | X         | Y         | Z         |
|-------|-----------|-----------|-----------|
| 1 Cl  | -1.601945 | 1.408828  | 0.000000  |
| 2 C   | -3.445015 | -0.556521 | 0.000000  |
| 3 H   | -3.759533 | -0.079446 | -0.921432 |
| 4 H   | -3.759533 | -0.079446 | 0.921432  |
| 5 C   | -2.805006 | -1.771850 | 0.000000  |
| 6 H   | -2.796596 | -2.349804 | 0.919568  |
| 7 H   | -2.796596 | -2.349804 | -0.919568 |
| 8 C   | -0.673541 | -1.592274 | 0.000000  |
| 9 H   | -0.565165 | -2.176876 | 0.916110  |
| 10 H  | -0.565165 | -2.176876 | -0.916110 |
| 11 Mo | 0.348012  | 0.054657  | 0.000000  |
| 12 Cl | 0.799235  | 0.766345  | 2.113420  |
| 13 Cl | 0.799235  | 0.766345  | -2.113420 |
| 14 Cl | 2.421821  | -1.150256 | 0.000000  |

Point Group: C<sub>s</sub> Number of degrees of freedom: 21

Energy is -2026.279298220



Distance Matrix (Angstroms)

|        | Cl( 1)   | C ( 2)   | H ( 3)   | H ( 4)   | C ( 5)   | H ( 6)   |
|--------|----------|----------|----------|----------|----------|----------|
| C ( 2) | 1.843887 |          |          |          |          |          |
| H ( 3) | 2.375852 | 1.091854 |          |          |          |          |
| H ( 4) | 2.377644 | 1.090531 | 1.788656 |          |          |          |
| C ( 5) | 2.748002 | 1.517195 | 2.187348 | 2.192294 |          |          |
| H ( 6) | 2.985539 | 2.148156 | 3.079488 | 2.471183 | 1.096779 |          |
| H ( 7) | 3.714366 | 2.119214 | 2.493782 | 2.527435 | 1.101553 | 1.763110 |
| C ( 8) | 3.125855 | 2.551439 | 2.852043 | 3.512134 | 1.531861 | 2.164738 |
| H ( 9) | 4.115017 | 3.503829 | 3.857079 | 4.356279 | 2.188346 | 2.505514 |
| H (10) | 3.525718 | 2.840857 | 2.700347 | 3.872200 | 2.197088 | 3.098042 |
| Mo(11) | 2.761770 | 3.450799 | 3.727635 | 4.432706 | 3.142561 | 3.465252 |
| Cl(12) | 3.405722 | 4.383041 | 5.109310 | 5.023426 | 3.918098 | 3.544554 |
| Cl(13) | 5.073058 | 5.467826 | 5.618669 | 6.489356 | 4.732257 | 5.025978 |
| Cl(14) | 3.414981 | 4.249247 | 3.973705 | 5.231938 | 4.567351 | 5.219092 |
|        | H ( 7)   | C ( 8)   | H ( 9)   | H (10)   | Mo(11)   | Cl(12)   |
| C ( 8) | 2.172561 |          |          |          |          |          |
| H ( 9) | 2.534643 | 1.096311 |          |          |          |          |
| H (10) | 2.534187 | 1.110588 | 1.774872 |          |          |          |
| Mo(11) | 4.087502 | 2.090110 | 2.683960 | 2.439667 |          |          |
| Cl(12) | 4.941313 | 3.404512 | 3.608775 | 4.263011 | 2.276122 |          |
| Cl(13) | 5.404534 | 3.262932 | 3.104751 | 3.349555 | 2.317691 | 3.453033 |
| Cl(14) | 5.355266 | 3.664192 | 4.456954 | 3.297223 | 2.285100 | 4.276776 |
|        | Cl(13)   |          |          |          |          |          |
| Cl(14) | 3.454625 |          |          |          |          |          |

## **RI-W**

Coordinates (Angstroms)

| ATOM | X         | Y         | Z         |
|------|-----------|-----------|-----------|
| 1 W  | 0.000000  | 0.000000  | 0.127888  |
| 2 Cl | 2.349686  | 0.000000  | -0.221974 |
| 3 Cl | 0.000000  | -2.171449 | -0.558750 |
| 4 Cl | 0.000000  | 2.171449  | -0.558750 |
| 5 Cl | -2.349686 | 0.000000  | -0.221974 |
| 6 C  | 0.000000  | 0.000000  | 1.991042  |
| 7 H  | 0.000000  | -0.929034 | 2.567355  |
| 8 H  | 0.000000  | 0.929034  | 2.567355  |

Point Group: C<sub>2v</sub> Number of degrees of freedom: 7

Energy is -1948.028406028

Distance Matrix (Angstroms)

|        | W ( 1)   | Cl( 2)   | Cl( 3)   | Cl( 4)   | Cl( 5)   | C ( 6)   |
|--------|----------|----------|----------|----------|----------|----------|
| Cl( 2) | 2.375589 |          |          |          |          |          |
| Cl( 3) | 2.277425 | 3.217084 |          |          |          |          |
| Cl( 4) | 2.277425 | 3.217084 | 4.342898 |          |          |          |
| Cl( 5) | 2.375589 | 4.699371 | 3.217084 | 3.217084 |          |          |
| C ( 6) | 1.863154 | 3.227764 | 3.349124 | 3.349124 | 3.227764 |          |
| H ( 7) | 2.610384 | 3.763574 | 3.363946 | 4.402900 | 3.763574 | 1.093271 |
| H ( 8) | 2.610384 | 3.763574 | 4.402900 | 3.363946 | 3.763574 | 1.093271 |
|        | H ( 7)   |          |          |          |          |          |
| H ( 8) | 1.858069 |          |          |          |          |          |

## **R4-W**

| Coordinates (Angstroms) |           |           |           |
|-------------------------|-----------|-----------|-----------|
| ATOM                    | X         | Y         | Z         |
| 1 W                     | 0.056565  | 0.169389  | 0.000000  |
| 2 Cl                    | -2.232867 | 0.181143  | 0.000000  |
| 3 Cl                    | 0.896406  | 0.138882  | -2.112134 |
| 4 Cl                    | 0.067442  | -2.256282 | 0.000000  |
| 5 Cl                    | 0.896406  | 0.138882  | 2.112134  |
| 6 C                     | 0.247104  | 2.095078  | 0.000000  |
| 7 H                     | 0.308793  | 2.708199  | 0.904011  |
| 8 H                     | 0.308793  | 2.708199  | -0.904011 |

Point Group: C<sub>s</sub> Number of degrees of freedom: 11

Energy is -1948.007162653

| Distance Matrix (Angstroms) |          |          |          |          |          |          |
|-----------------------------|----------|----------|----------|----------|----------|----------|
|                             | W ( 1)   | Cl( 2)   | Cl( 3)   | Cl( 4)   | Cl( 5)   | C ( 6)   |
| Cl( 2)                      | 2.289462 |          |          |          |          |          |
| Cl( 3)                      | 2.273185 | 3.775612 |          |          |          |          |
| Cl( 4)                      | 2.425696 | 3.351487 | 3.299258 |          |          |          |
| Cl( 5)                      | 2.273185 | 3.775612 | 4.224267 | 3.299258 |          |          |
| C ( 6)                      | 1.935092 | 3.132635 | 2.951170 | 4.355068 | 2.951170 |          |
| H ( 7)                      | 2.706734 | 3.696387 | 4.005472 | 5.051887 | 2.899352 | 1.094056 |
| H ( 8)                      | 2.706734 | 3.696387 | 2.899352 | 5.051887 | 4.005472 | 1.094056 |
| H ( 7)                      |          |          |          |          |          |          |
| H ( 8)                      | 1.808021 |          |          |          |          |          |

## **R2-W**

| Coordinates (Angstroms) |           |           |           |
|-------------------------|-----------|-----------|-----------|
| ATOM                    | X         | Y         | Z         |
| 1 W                     | -0.378347 | -0.048741 | 0.000000  |
| 2 Cl                    | 3.001797  | -0.325780 | 0.000000  |
| 3 Cl                    | -1.154040 | -0.480690 | -2.065579 |
| 4 Cl                    | 0.306796  | 2.128348  | 0.000000  |
| 5 Cl                    | -1.154040 | -0.480690 | 2.065579  |
| 6 C                     | 1.370367  | -1.173811 | 0.000000  |
| 7 H                     | 1.383374  | -1.825275 | 0.882129  |
| 8 H                     | 1.383374  | -1.825275 | -0.882129 |

Point Group: C<sub>s</sub> Number of degrees of freedom: 11

Energy is -1947.978633867

| Distance Matrix (Angstroms) |          |          |          |          |          |          |
|-----------------------------|----------|----------|----------|----------|----------|----------|
|                             | W ( 1)   | Cl( 2)   | Cl( 3)   | Cl( 4)   | Cl( 5)   | C ( 6)   |
| Cl( 2)                      | 3.391478 |          |          |          |          |          |
| Cl( 3)                      | 2.248310 | 4.643446 |          |          |          |          |
| Cl( 4)                      | 2.282354 | 3.644965 | 3.634245 |          |          |          |
| Cl( 5)                      | 2.248310 | 4.643446 | 4.131158 | 3.634245 |          |          |
| C ( 6)                      | 2.079371 | 1.838674 | 3.334616 | 3.469213 | 3.334616 |          |
| H ( 7)                      | 2.652902 | 2.376116 | 4.115260 | 4.191457 | 3.105951 | 1.096689 |
| H ( 8)                      | 2.652902 | 2.376116 | 3.105951 | 4.191457 | 4.115260 | 1.096689 |
| H ( 7)                      |          |          |          |          |          |          |
| H ( 8)                      | 1.764259 |          |          |          |          |          |

## p1-W

| ATOM | Coordinates (Angstroms) |           |           |
|------|-------------------------|-----------|-----------|
|      | X                       | Y         | Z         |
| 1 W  | -0.191379               | -0.000011 | -0.005935 |
| 2 C  | 1.477261                | 0.000112  | -1.379308 |
| 3 H  | 1.637567                | 0.911070  | -1.950042 |
| 4 H  | 1.637466                | -0.910776 | -1.950149 |
| 5 Cl | 2.604520                | -0.000081 | 0.047324  |
| 6 Cl | -2.408464               | 0.000130  | -0.405544 |
| 7 Cl | -0.031543               | 2.354995  | -0.431000 |
| 8 Cl | -0.031754               | -2.355025 | -0.431063 |
| 9 C  | -0.015450               | -0.717378 | 2.027673  |
| 10 H | 0.896747                | -1.277269 | 2.215159  |
| 11 H | -0.919849               | -1.262359 | 2.298464  |
| 12 C | -0.015652               | 0.717327  | 2.027759  |
| 13 H | 0.896441                | 1.277406  | 2.215202  |
| 14 H | -0.920179               | 1.262031  | 2.298658  |

Point Group: C<sub>1</sub> Number of degrees of freedom: 36

Energy is -2026.621537896

| Distance Matrix (Angstroms) |          |          |          |          |          |          |
|-----------------------------|----------|----------|----------|----------|----------|----------|
|                             | W ( 1)   | C ( 2)   | H ( 3)   | H ( 4)   | Cl( 5)   | Cl( 6)   |
| C ( 2)                      | 2.161137 |          |          |          |          |          |
| H ( 3)                      | 2.820401 | 1.086867 |          |          |          |          |
| H ( 4)                      | 2.820307 | 1.086849 | 1.821846 |          |          |          |
| Cl( 5)                      | 2.796406 | 1.818238 | 2.398888 | 2.398845 |          |          |
| Cl( 6)                      | 2.252810 | 4.005880 | 4.425568 | 4.425505 | 5.033398 |          |
| Cl( 7)                      | 2.398391 | 2.953177 | 2.679242 | 3.969718 | 3.567072 | 3.346010 |
| Cl( 8)                      | 2.398397 | 2.953467 | 3.970052 | 2.679510 | 3.567150 | 3.346066 |
| C ( 9)                      | 2.163592 | 3.788205 | 4.605054 | 4.311913 | 3.361627 | 3.487389 |
| H ( 10)                     | 2.783643 | 3.858612 | 4.763039 | 4.246500 | 3.040922 | 4.407296 |
| H ( 11)                     | 2.726619 | 4.567930 | 5.414238 | 4.971336 | 4.368313 | 3.334894 |
| C ( 12)                     | 2.163647 | 3.788310 | 4.312026 | 4.605135 | 3.361859 | 3.487246 |
| H ( 13)                     | 2.783630 | 3.858670 | 4.246495 | 4.763129 | 3.041249 | 4.407056 |
| H ( 14)                     | 2.726728 | 4.568106 | 4.971588 | 5.414332 | 4.368630 | 3.334681 |
| Cl( 7)                      |          | Cl( 8)   | C ( 9)   | H ( 10)  | H ( 11)  | C ( 12)  |
| Cl( 8)                      |          | 4.710020 |          |          |          |          |
| C ( 9)                      |          | 3.935074 | 2.954241 |          |          |          |
| H ( 10)                     |          | 4.588814 | 3.004357 | 1.086615 |          |          |
| H ( 11)                     |          | 4.617825 | 3.071311 | 1.090078 | 1.818567 |          |
| C ( 12)                     |          | 2.954268 | 3.935151 | 1.434705 | 2.201364 | 2.193174 |
| H ( 13)                     |          | 3.004120 | 4.588989 | 2.201335 | 2.554675 | 3.123500 |
| H ( 14)                     |          | 3.071689 | 4.617767 | 2.193177 | 3.123497 | 2.524389 |
|                             |          | H ( 13)  |          |          |          |          |
| H ( 14)                     |          | 1.818601 |          |          |          |          |



## TS1-W

| ATOM | Coordinates (Angstroms) |           |           |
|------|-------------------------|-----------|-----------|
|      | X                       | Y         | Z         |
| 1 W  | 0.047743                | -0.018181 | 0.099651  |
| 2 Cl | 2.191519                | -0.757147 | -0.456354 |
| 3 Cl | 0.985120                | 1.905695  | 1.009482  |
| 4 Cl | -2.257535               | 0.070857  | 0.676609  |
| 5 Cl | -0.660022               | 1.422927  | -1.716980 |
| 6 C  | 0.015859                | -1.247470 | 1.652497  |
| 7 H  | 0.964771                | -1.680871 | 1.983029  |
| 8 H  | -0.826563               | -1.535570 | 2.276064  |
| 9 C  | -0.534479               | -1.656536 | -1.376314 |
| 10 H | 0.242890                | -1.731953 | -2.127937 |
| 11 H | -1.520345               | -1.394696 | -1.745162 |
| 12 C | -0.440767               | -2.440542 | -0.198316 |
| 13 H | -1.353464               | -2.747797 | 0.301292  |
| 14 H | 0.441330                | -3.049962 | -0.032467 |

Point Group: C<sub>1</sub> Number of degrees of freedom: 36

Energy is -2026.611182571

| Distance Matrix (Angstroms) |          |          |          |          |          |          |
|-----------------------------|----------|----------|----------|----------|----------|----------|
|                             | W ( 1)   | Cl( 2)   | Cl( 3)   | Cl( 4)   | Cl( 5)   | C ( 6)   |
| Cl( 2)                      | 2.334735 |          |          |          |          |          |
| Cl( 3)                      | 2.325461 | 3.270291 |          |          |          |          |
| Cl( 4)                      | 2.378049 | 4.665113 | 3.740621 |          |          |          |
| Cl( 5)                      | 2.424432 | 3.804364 | 3.220738 | 3.179530 |          |          |
| C ( 6)                      | 1.980783 | 3.069392 | 3.360861 | 2.803331 | 4.352151 |          |
| H ( 7)                      | 2.674433 | 2.882493 | 3.716405 | 3.893397 | 5.095448 | 1.094314 |
| H ( 8)                      | 2.793502 | 4.144981 | 4.090077 | 2.680772 | 4.972408 | 1.086974 |
| C ( 9)                      | 2.280715 | 3.014348 | 4.548702 | 3.188620 | 3.100791 | 3.105463 |
| H ( 10)                     | 2.817311 | 2.746196 | 4.860739 | 4.167460 | 3.307174 | 3.818108 |
| H ( 11)                     | 2.785145 | 3.980632 | 4.975742 | 2.925110 | 2.946176 | 3.731714 |
| C ( 12)                     | 2.489028 | 3.135176 | 4.730931 | 3.220756 | 4.157019 | 2.248875 |
| H ( 13)                     | 3.074874 | 4.135653 | 5.255997 | 2.983793 | 4.685000 | 2.439628 |
| H ( 14)                     | 3.060075 | 2.915449 | 5.093123 | 4.186427 | 4.904824 | 2.503819 |
|                             | H ( 7)   | H ( 8)   | C ( 9)   | H ( 10)  | H ( 11)  | C ( 12)  |
| H ( 8)                      | 1.820951 |          |          |          |          |          |
| C ( 9)                      | 3.678795 | 3.666034 |          |          |          |          |
| H ( 10)                     | 4.174178 | 4.536245 | 1.083941 |          |          |          |
| H ( 11)                     | 4.489667 | 4.083067 | 1.084685 | 1.835553 |          |          |
| C ( 12)                     | 2.703868 | 2.662775 | 1.418142 | 2.166315 | 2.156854 |          |
| H ( 13)                     | 3.056270 | 2.376308 | 2.162394 | 3.079194 | 2.459005 | 1.084911 |
| H ( 14)                     | 2.492113 | 3.038133 | 2.167894 | 2.483449 | 3.085677 | 1.084893 |
|                             | H ( 13)  |          |          |          |          |          |
| H ( 14)                     | 1.850402 |          |          |          |          |          |

## **pdt1-W**

| Coordinates (Angstroms) |           |           |           |
|-------------------------|-----------|-----------|-----------|
| ATOM                    | X         | Y         | Z         |
| 1 W                     | 0.113559  | 0.068559  | 0.000000  |
| 2 Cl                    | 0.980042  | -2.054939 | 0.000000  |
| 3 Cl                    | 0.901967  | 0.348811  | 2.198532  |
| 4 Cl                    | -0.509913 | 2.282504  | 0.000000  |
| 5 Cl                    | 0.901967  | 0.348811  | -2.198532 |
| 6 C                     | -1.664427 | -0.624302 | 1.139482  |
| 7 H                     | -1.368183 | -1.229257 | 1.998082  |
| 8 H                     | -2.146407 | 0.291536  | 1.494548  |
| 9 C                     | -1.664427 | -0.624302 | -1.139482 |
| 10 H                    | -1.368183 | -1.229257 | -1.998082 |
| 11 H                    | -2.146407 | 0.291536  | -1.494548 |
| 12 C                    | -2.398574 | -1.308252 | 0.000000  |
| 13 H                    | -3.485867 | -1.156136 | 0.000000  |
| 14 H                    | -2.205831 | -2.386187 | 0.000000  |

Point Group: C<sub>s</sub> Number of degrees of freedom: 21

Energy is -2026.636744262

| Distance Matrix (Angstroms) |          |          |          |          |          |          |
|-----------------------------|----------|----------|----------|----------|----------|----------|
|                             | W ( 1)   | Cl( 2)   | Cl( 3)   | Cl( 4)   | Cl( 5)   | C ( 6)   |
| Cl( 2)                      | 2.293477 |          |          |          |          |          |
| Cl( 3)                      | 2.352376 | 3.258474 |          |          |          |          |
| Cl( 4)                      | 2.300058 | 4.586216 | 3.250557 |          |          |          |
| Cl( 5)                      | 2.352376 | 3.258474 | 4.397065 | 3.250557 |          |          |
| C ( 6)                      | 2.222546 | 3.215332 | 2.941924 | 3.328790 | 4.321535 |          |
| H ( 7)                      | 2.805748 | 3.191903 | 2.772014 | 4.130548 | 5.025481 | 1.091295 |
| H ( 8)                      | 2.718609 | 4.185009 | 3.129131 | 2.979218 | 4.789019 | 1.094136 |
| C ( 9)                      | 2.222546 | 3.215332 | 4.321535 | 3.328790 | 2.941924 | 2.278964 |
| H ( 10)                     | 2.805748 | 3.191903 | 5.025481 | 4.130548 | 2.772014 | 3.209056 |
| H ( 11)                     | 2.718609 | 4.185009 | 4.789019 | 2.979218 | 3.129131 | 2.830049 |
| C ( 12)                     | 2.864685 | 3.460142 | 4.298020 | 4.057163 | 4.298020 | 1.518282 |
| H ( 13)                     | 3.802071 | 4.555458 | 5.133372 | 4.547587 | 5.133372 | 2.213349 |
| H ( 14)                     | 3.377180 | 3.203047 | 4.687448 | 4.967173 | 4.687448 | 2.166974 |
|                             | H ( 7)   | H ( 8)   | C ( 9)   | H ( 10)  | H ( 11)  | C ( 12)  |
| H ( 8)                      | 1.781008 |          |          |          |          |          |
| C ( 9)                      | 3.209056 | 2.830049 |          |          |          |          |
| H ( 10)                     | 3.996165 | 3.888047 | 1.091295 |          |          |          |
| H ( 11)                     | 3.888047 | 2.989095 | 1.094136 | 1.781008 |          |          |
| C ( 12)                     | 2.249506 | 2.203766 | 1.518282 | 2.249506 | 2.203766 |          |
| H ( 13)                     | 2.912433 | 2.474587 | 2.213349 | 2.912433 | 2.474587 | 1.097883 |
| H ( 14)                     | 2.456109 | 3.067149 | 2.166974 | 2.456109 | 3.067149 | 1.095031 |
|                             | H ( 13)  |          |          |          |          |          |
| H ( 14)                     | 1.775252 |          |          |          |          |          |

## TS2-W

| Coordinates (Angstroms) |           |           |           |
|-------------------------|-----------|-----------|-----------|
| ATOM                    | X         | Y         | Z         |
| 1 Cl                    | -1.672662 | 1.348864  | 0.000000  |
| 2 C                     | -3.469879 | -0.539792 | 0.000000  |
| 3 H                     | -3.822436 | -0.089869 | -0.921212 |
| 4 H                     | -3.822436 | -0.089869 | 0.921212  |
| 5 C                     | -2.773949 | -1.740434 | 0.000000  |
| 6 H                     | -2.815639 | -2.328079 | 0.913645  |
| 7 H                     | -2.815639 | -2.328079 | -0.913645 |
| 8 C                     | -0.760703 | -1.598413 | 0.000000  |
| 9 H                     | -0.595976 | -2.193006 | 0.903669  |
| 10 H                    | -0.595976 | -2.193006 | -0.903669 |
| 11 W                    | 0.289096  | 0.049200  | 0.000000  |
| 12 Cl                   | 0.664159  | 0.688969  | 2.158283  |
| 13 Cl                   | 0.664159  | 0.688969  | -2.158283 |
| 14 Cl                   | 2.409176  | -1.029570 | 0.000000  |

Point Group: C<sub>s</sub> Number of degrees of freedom: 21

Energy is -2026.593764066

| Distance Matrix (Angstroms) |          |          |          |          |          |          |
|-----------------------------|----------|----------|----------|----------|----------|----------|
|                             | Cl ( 1)  | C ( 2)   | H ( 3)   | H ( 4)   | C ( 5)   | H ( 6)   |
| C ( 2)                      | 2.607109 |          |          |          |          |          |
| H ( 3)                      | 2.745927 | 1.084139 |          |          |          |          |
| H ( 4)                      | 2.745927 | 1.084139 | 1.842424 |          |          |          |
| C ( 5)                      | 3.279725 | 1.387753 | 2.161555 | 2.161555 |          |          |
| H ( 6)                      | 3.957405 | 2.112048 | 3.064298 | 2.454237 | 1.087112 |          |
| H ( 7)                      | 3.957405 | 2.112048 | 2.454237 | 3.064298 | 1.087112 | 1.827290 |
| C ( 8)                      | 3.085144 | 2.908662 | 3.535328 | 3.535328 | 2.018250 | 2.364301 |
| H ( 9)                      | 3.810606 | 3.436430 | 4.261856 | 3.851432 | 2.401043 | 2.223791 |
| H ( 10)                     | 3.810606 | 3.436430 | 3.851432 | 4.261856 | 2.401043 | 2.871894 |
| W ( 11)                     | 2.353215 | 3.804840 | 4.215764 | 4.215764 | 3.547540 | 4.015667 |
| Cl ( 12)                    | 3.248750 | 4.822687 | 5.497219 | 4.718736 | 4.730832 | 4.770817 |
| Cl ( 13)                    | 3.248750 | 4.822687 | 4.718736 | 5.497219 | 4.730832 | 5.536092 |
| Cl ( 14)                    | 4.724230 | 5.899421 | 6.369038 | 6.369038 | 5.231646 | 5.460729 |
|                             | H ( 7)   | C ( 8)   | H ( 9)   | H ( 10)  | W ( 11)  | Cl ( 12) |
| C ( 8)                      | 2.364301 |          |          |          |          |          |
| H ( 9)                      | 2.871894 | 1.094209 |          |          |          |          |
| H ( 10)                     | 2.223791 | 1.094209 | 1.807339 |          |          |          |
| W ( 11)                     | 4.015667 | 1.953639 | 2.574385 | 2.574385 |          |          |
| Cl ( 12)                    | 5.536092 | 3.452612 | 3.386410 | 4.389678 | 2.282140 |          |
| Cl ( 13)                    | 4.770817 | 3.452612 | 4.389678 | 3.386410 | 2.282140 | 4.316565 |
| Cl ( 14)                    | 5.460729 | 3.220514 | 3.346811 | 3.346811 | 2.378756 | 3.264451 |
|                             | Cl ( 13) |          |          |          |          |          |
| Cl ( 14)                    | 3.264451 |          |          |          |          |          |

## **pdt2-W**

| ATOM  | Coordinates (Angstroms) |           |           |
|-------|-------------------------|-----------|-----------|
|       | X                       | Y         | Z         |
| 1 Cl  | -2.073109               | 0.244772  | 0.970731  |
| 2 C   | -2.991642               | 0.211673  | -0.655264 |
| 3 H   | -3.030324               | 1.256366  | -0.969984 |
| 4 H   | -3.988653               | -0.151549 | -0.405634 |
| 5 C   | -2.220879               | -0.676586 | -1.608476 |
| 6 H   | -2.338778               | -1.724799 | -1.307913 |
| 7 H   | -2.689956               | -0.574755 | -2.598623 |
| 8 C   | -0.721832               | -0.324105 | -1.686536 |
| 9 H   | -0.197051               | -1.014615 | -2.359448 |
| 10 H  | -0.582987               | 0.688297  | -2.121460 |
| 11 W  | 0.353740                | 0.020365  | 0.073910  |
| 12 Cl | 0.376663                | -2.043964 | 1.037444  |
| 13 Cl | 2.489064                | -0.181409 | -0.832574 |
| 14 Cl | 0.532270                | 2.270107  | 0.466830  |

Point Group: C<sub>1</sub> Number of degrees of freedom: 36

Energy is -2026.624358131

|         | Distance Matrix (Angstroms) |          |          |          |          |          |
|---------|-----------------------------|----------|----------|----------|----------|----------|
|         | Cl( 1)                      | C ( 2)   | H ( 3)   | H ( 4)   | C ( 5)   | H ( 6)   |
| C ( 2)  | 1.867795                    |          |          |          |          |          |
| H ( 3)  | 2.388714                    | 1.091755 |          |          |          |          |
| H ( 4)  | 2.391811                    | 1.090080 | 1.794188 |          |          |          |
| C ( 5)  | 2.742817                    | 1.513834 | 2.190702 | 2.201708 |          |          |
| H ( 6)  | 3.023576                    | 2.145252 | 3.078924 | 2.451797 | 1.096808 |          |
| H ( 7)  | 3.713813                    | 2.118047 | 2.474129 | 2.583586 | 1.100360 | 1.764046 |
| C ( 8)  | 3.034903                    | 2.550023 | 2.887987 | 3.513204 | 1.541907 | 2.172512 |
| H ( 9)  | 4.024393                    | 3.495392 | 3.887853 | 4.351841 | 2.184972 | 2.489394 |
| H ( 10) | 3.461043                    | 2.859811 | 2.763703 | 3.904863 | 2.192886 | 3.093168 |
| W ( 11) | 2.596968                    | 3.429268 | 3.750907 | 4.372172 | 3.153543 | 3.493520 |
| Cl( 12) | 3.353230                    | 4.393022 | 5.150680 | 4.971890 | 3.951942 | 3.602247 |
| Cl( 13) | 4.924120                    | 5.497644 | 5.705236 | 6.491840 | 4.799041 | 5.090781 |
| Cl( 14) | 3.338247                    | 4.232517 | 3.972931 | 5.202341 | 4.535386 | 5.229904 |
|         | H ( 7)                      | C ( 8)   | H ( 9)   | H ( 10)  | W ( 11)  | Cl( 12)  |
| C ( 8)  | 2.183630                    |          |          |          |          |          |
| H ( 9)  | 2.542687                    | 1.097729 |          |          |          |          |
| H ( 10) | 2.502459                    | 1.110583 | 1.762240 |          |          |          |
| W ( 11) | 4.093982                    | 2.091575 | 2.701071 | 2.478556 |          |          |
| Cl( 12) | 4.978324                    | 3.403626 | 3.595495 | 4.285423 | 2.278240 |          |
| Cl( 13) | 5.485973                    | 3.325578 | 3.200123 | 3.443126 | 2.328526 | 3.380579 |
| Cl( 14) | 5.279486                    | 3.597178 | 4.394217 | 3.231898 | 2.290763 | 4.354425 |
|         | Cl( 13)                     |          |          |          |          |          |
| Cl( 14) | 3.395206                    |          |          |          |          |          |

## **R1-Ru**

Coordinates (Angstroms)

| ATOM | X         | Y         | Z         |
|------|-----------|-----------|-----------|
| 1 Ru | 0.000000  | 0.000000  | -0.001091 |
| 2 Cl | 0.000000  | -2.270669 | 0.461498  |
| 3 Cl | 2.339333  | 0.000000  | 0.003936  |
| 4 Cl | -2.339333 | 0.000000  | 0.003936  |
| 5 Cl | 0.000000  | 2.270669  | 0.461498  |
| 6 C  | 0.000000  | 0.000000  | -1.834501 |
| 7 H  | 0.942864  | 0.000000  | -2.384882 |
| 8 H  | -0.942864 | 0.000000  | -2.384882 |

Point Group: C<sub>2v</sub> Number of degrees of freedom: 7

Energy is -1973.972019323

Distance Matrix (Angstroms)

|        | Ru( 1)   | Cl( 2)   | Cl( 3)   | Cl( 4)   | Cl( 5)   | C ( 6)   |
|--------|----------|----------|----------|----------|----------|----------|
| Cl( 2) | 2.317310 |          |          |          |          |          |
| Cl( 3) | 2.339338 | 3.292078 |          |          |          |          |
| Cl( 4) | 2.339338 | 3.292078 | 4.678666 |          |          |          |
| Cl( 5) | 2.317310 | 4.541337 | 3.292078 | 3.292078 |          |          |
| C ( 6) | 1.833410 | 3.229172 | 2.975287 | 2.975287 | 3.229172 |          |
| H ( 7) | 2.563484 | 3.761225 | 2.767052 | 4.059467 | 3.761225 | 1.091747 |
| H ( 8) | 2.563484 | 3.761225 | 4.059467 | 2.767052 | 3.761225 | 1.091747 |
| H ( 7) |          |          |          |          |          |          |
| H ( 8) | 1.885728 |          |          |          |          |          |

## **R2-Ru**

Coordinates (Angstroms)

| ATOM | X         | Y         | Z         |
|------|-----------|-----------|-----------|
| 1 Ru | -0.338012 | 0.032841  | 0.000000  |
| 2 Cl | 2.840218  | -0.492841 | 0.000000  |
| 3 Cl | -1.432883 | -0.539656 | -1.855176 |
| 4 Cl | 0.324570  | 2.161206  | 0.000000  |
| 5 Cl | -1.432883 | -0.539656 | 1.855176  |
| 6 C  | 1.248672  | -1.281915 | 0.000000  |
| 7 H  | 1.148558  | -1.883713 | 0.905983  |
| 8 H  | 1.148558  | -1.883713 | -0.905983 |

Point Group: C<sub>s</sub> Number of degrees of freedom: 11

Energy is -1974.025450210

Distance Matrix (Angstroms)

|        | Ru( 1)   | Cl( 2)   | Cl( 3)   | Cl( 4)   | Cl( 5)   | C ( 6)   |
|--------|----------|----------|----------|----------|----------|----------|
| Cl( 2) | 3.221411 |          |          |          |          |          |
| Cl( 3) | 2.228940 | 4.658676 |          |          |          |          |
| Cl( 4) | 2.229115 | 3.656836 | 3.718196 |          |          |          |
| Cl( 5) | 2.228940 | 4.658676 | 3.710351 | 3.718196 |          |          |
| C ( 6) | 2.060618 | 1.776417 | 3.344153 | 3.564975 | 3.344153 |          |
| H ( 7) | 2.589184 | 2.370030 | 4.011773 | 4.226243 | 3.061257 | 1.092240 |
| H ( 8) | 2.589184 | 2.370030 | 3.061257 | 4.226243 | 4.011773 | 1.092240 |
| H ( 7) |          |          |          |          |          |          |
| H ( 8) | 1.811966 |          |          |          |          |          |

## **p1-Ru**

Coordinates (Angstroms)

| ATOM | X         | Y         | Z         |
|------|-----------|-----------|-----------|
| 1 Ru | -0.168064 | -0.000317 | -0.027422 |
| 2 C  | 1.399323  | 0.003809  | -1.378341 |
| 3 H  | 1.439139  | 0.937200  | -1.933442 |
| 4 H  | 1.444251  | -0.929306 | -1.933525 |
| 5 Cl | 2.519059  | 0.006790  | -0.017350 |
| 6 Cl | -2.360384 | -0.006674 | -0.474303 |
| 7 Cl | -0.157431 | 2.399657  | -0.336425 |
| 8 Cl | -0.143319 | -2.400338 | -0.336521 |
| 9 C  | -0.089005 | -0.706550 | 2.033127  |
| 10 H | 0.826431  | -1.269604 | 2.180119  |
| 11 H | -1.007409 | -1.263794 | 2.191039  |
| 12 C | -0.093094 | 0.705666  | 2.033351  |
| 13 H | 0.819067  | 1.273974  | 2.180445  |
| 14 H | -1.014742 | 1.257512  | 2.191309  |

Point Group: C<sub>1</sub> Number of degrees of freedom: 36

Energy is -2052.623463781

Distance Matrix (Angstroms)

|         | Ru( 1)   | C ( 2)   | H ( 3)   | H ( 4)   | Cl( 5)   | Cl( 6)   |          |
|---------|----------|----------|----------|----------|----------|----------|----------|
| C ( 2)  | 2.069227 |          |          |          |          |          |          |
| H ( 3)  | 2.663634 | 1.086711 |          |          |          |          |          |
| H ( 4)  | 2.663796 | 1.086716 | 1.866513 |          |          |          |          |
| Cl( 5)  | 2.687150 | 1.762417 | 2.388157 | 2.388140 |          |          |          |
| Cl( 6)  | 2.237412 | 3.866884 | 4.178081 | 4.178018 | 4.900811 |          |          |
| Cl( 7)  | 2.419808 | 3.041243 | 2.690405 | 4.024688 | 3.604333 | 3.265340 |          |
| Cl( 8)  | 2.419970 | 3.040569 | 4.024114 | 2.689747 | 3.603386 | 3.265577 |          |
| C ( 9)  | 2.179651 | 3.789175 | 4.557500 | 4.258500 | 3.393421 | 3.454880 |          |
| H ( 10) | 2.733742 | 3.822620 | 4.708161 | 4.173676 | 3.053366 | 4.335521 |          |
| H ( 11) | 2.687460 | 4.487722 | 5.276487 | 4.809839 | 4.350557 | 3.242675 |          |
| C ( 12) | 2.179637 | 3.789400 | 4.258731 | 4.557704 | 3.393692 | 3.454904 |          |
| H ( 13) | 2.733665 | 3.822954 | 4.173964 | 4.708509 | 3.053855 | 4.335512 |          |
| H ( 14) | 2.687334 | 4.487970 | 4.810166 | 5.276654 | 4.350888 | 3.242592 |          |
| Cl( 7)  |          | Cl( 8)   | C ( 9)   | H ( 10)  | H ( 11)  | C ( 12)  |          |
| Cl( 8)  |          | 4.800016 |          |          |          |          |          |
| C ( 9)  |          | 3.907426 | 2.913263 |          |          |          |          |
| H ( 10) |          | 4.556803 | 2.924457 | 1.084739 |          |          |          |
| H ( 11) |          | 4.531160 | 2.902920 | 1.085782 | 1.833882 |          |          |
| C ( 12) |          | 2.913689 | 3.907182 | 1.412221 | 2.183748 | 2.177064 |          |
| H ( 13) |          | 2.924952 | 4.556521 | 2.183752 | 2.543589 | 3.126723 | 1.084735 |
| H ( 14) |          | 2.903259 | 4.530913 | 2.177051 | 3.126717 | 2.521317 | 1.085781 |
| H ( 13) |          |          |          |          |          |          |          |
| H ( 14) |          |          |          |          |          |          | 1.833915 |

## TS1-Ru

| ATOM | Coordinates (Angstroms) |           |           |
|------|-------------------------|-----------|-----------|
|      | X                       | Y         | Z         |
| 1 Ru | -0.145433               | 0.035712  | 0.061115  |
| 2 Cl | -2.387140               | 0.490328  | -0.296734 |
| 3 Cl | -0.719011               | -2.220780 | 0.483057  |
| 4 Cl | 2.271135                | 0.017843  | 0.865835  |
| 5 Cl | 1.084767                | -0.829306 | -1.730454 |
| 6 C  | -0.256726               | 0.500850  | 1.879811  |
| 7 H  | -1.264826               | 0.631023  | 2.280166  |
| 8 H  | 0.579091                | 0.592350  | 2.568484  |
| 9 C  | 0.381060                | 2.087716  | -1.075251 |
| 10 H | -0.409113               | 2.090069  | -1.819972 |
| 11 H | 1.393579                | 1.899090  | -1.412318 |
| 12 C | 0.147841                | 2.551757  | 0.191990  |
| 13 H | 0.976040                | 2.716591  | 0.874923  |
| 14 H | -0.837795               | 2.899260  | 0.485690  |

Point Group: C<sub>1</sub> Number of degrees of freedom: 36

Energy is -2052.558692808

| Distance Matrix (Angstroms) |          |          |          |          |          |          |
|-----------------------------|----------|----------|----------|----------|----------|----------|
|                             | Ru( 1)   | Cl( 2)   | Cl( 3)   | Cl( 4)   | Cl( 5)   | C ( 6)   |
| Cl( 2)                      | 2.315164 |          |          |          |          |          |
| Cl( 3)                      | 2.366175 | 3.277321 |          |          |          |          |
| Cl( 4)                      | 2.547094 | 4.824348 | 3.754853 |          |          |          |
| Cl( 5)                      | 2.339096 | 3.981347 | 3.176389 | 2.977558 |          |          |
| C ( 6)                      | 1.880530 | 3.045672 | 3.093847 | 2.766139 | 4.074670 |          |
| H ( 7)                      | 2.555705 | 2.814214 | 3.414717 | 3.857375 | 4.872189 | 1.092472 |
| H ( 8)                      | 2.668648 | 4.125338 | 3.734672 | 2.468215 | 4.556061 | 1.086846 |
| C ( 9)                      | 2.404005 | 3.289478 | 4.711859 | 3.409482 | 3.071403 | 3.414279 |
| H ( 10)                     | 2.797927 | 2.965133 | 4.897285 | 4.323356 | 3.280616 | 4.029545 |
| H ( 11)                     | 2.830501 | 4.186044 | 5.002880 | 3.082073 | 2.764185 | 3.939123 |
| C ( 12)                     | 2.536458 | 3.303705 | 4.859348 | 3.373894 | 4.000651 | 2.686752 |
| H ( 13)                     | 3.017797 | 4.200000 | 5.234920 | 2.993425 | 4.401500 | 2.727457 |
| H ( 14)                     | 2.976497 | 2.969109 | 5.121418 | 4.255880 | 4.744444 | 2.834358 |
|                             | H ( 7)   | H ( 8)   | C ( 9)   | H ( 10)  | H ( 11)  | C ( 12)  |
| H ( 8)                      | 1.866723 |          |          |          |          |          |
| C ( 9)                      | 4.011199 | 3.943620 |          |          |          |          |
| H ( 10)                     | 4.435335 | 4.741124 | 1.085812 |          |          |          |
| H ( 11)                     | 4.723299 | 4.268225 | 1.083692 | 1.858050 |          |          |
| C ( 12)                     | 3.169437 | 3.110141 | 1.369534 | 2.138070 | 2.133458 |          |
| H ( 13)                     | 3.368350 | 2.745563 | 2.133697 | 3.094130 | 2.464573 | 1.086040 |
| H ( 14)                     | 2.923594 | 3.415762 | 2.140268 | 2.480854 | 3.095449 | 1.085586 |
|                             | H ( 13)  |          |          |          |          |          |
| H ( 14)                     | 1.864099 |          |          |          |          |          |

## **pdt1-Ru**

| Coordinates (Angstroms) |           |           |           |
|-------------------------|-----------|-----------|-----------|
| ATOM                    | X         | Y         | Z         |
| 1 Ru                    | -0.252247 | 0.136795  | 0.000000  |
| 2 Cl                    | -2.490603 | -0.348827 | 0.000000  |
| 3 Cl                    | -0.036824 | 1.107679  | -2.031749 |
| 4 Cl                    | 2.236006  | 0.599234  | 0.000000  |
| 5 Cl                    | -0.036824 | 1.107679  | 2.031749  |
| 6 C                     | 0.534867  | -1.653881 | -1.099696 |
| 7 H                     | -0.430185 | -1.944543 | -1.515992 |
| 8 H                     | 1.236348  | -1.226549 | -1.807055 |
| 9 C                     | 0.534867  | -1.653881 | 1.099696  |
| 10 H                    | -0.430185 | -1.944543 | 1.515992  |
| 11 H                    | 1.236348  | -1.226549 | 1.807055  |
| 12 C                    | 1.076578  | -2.518710 | 0.000000  |
| 13 H                    | 2.166446  | -2.548701 | 0.000000  |
| 14 H                    | 0.662756  | -3.533025 | 0.000000  |

Point Group: C<sub>s</sub> Number of degrees of freedom: 21

Energy is -2052.586035507

| Distance Matrix (Angstroms) |          |          |          |          |          |          |
|-----------------------------|----------|----------|----------|----------|----------|----------|
|                             | Ru( 1)   | Cl( 2)   | Cl( 3)   | Cl( 4)   | Cl( 5)   | C ( 6)   |
| Cl( 2)                      | 2.290429 |          |          |          |          |          |
| Cl( 3)                      | 2.262085 | 3.502919 |          |          |          |          |
| Cl( 4)                      | 2.530860 | 4.820751 | 3.090675 |          |          |          |
| Cl( 5)                      | 2.262085 | 3.502919 | 4.063498 | 3.090675 |          |          |
| C ( 6)                      | 2.243970 | 3.473610 | 2.970146 | 3.029806 | 4.214142 |          |
| H ( 7)                      | 2.581058 | 3.014939 | 3.120384 | 3.984671 | 4.696515 | 1.090465 |
| H ( 8)                      | 2.709256 | 4.233911 | 2.668346 | 2.756491 | 4.669689 | 1.083995 |
| C ( 9)                      | 2.243970 | 3.473610 | 4.214142 | 3.029806 | 2.970146 | 2.199391 |
| H ( 10)                     | 2.581058 | 3.014939 | 4.696515 | 3.984671 | 3.120384 | 2.803147 |
| H ( 11)                     | 2.709256 | 4.233911 | 4.669689 | 2.756491 | 2.668346 | 3.020577 |
| C ( 12)                     | 2.969424 | 4.175305 | 4.303297 | 3.326536 | 4.303297 | 1.500236 |
| H ( 13)                     | 3.614134 | 5.150490 | 4.727739 | 3.148703 | 4.727739 | 2.161500 |
| H ( 14)                     | 3.782170 | 4.481382 | 5.114054 | 4.421615 | 5.114054 | 2.181025 |
|                             | H ( 7)   | H ( 8)   | C ( 9)   | H ( 10)  | H ( 11)  | C ( 12)  |
| H ( 8)                      | 1.837816 |          |          |          |          |          |
| C ( 9)                      | 2.803147 | 3.020577 |          |          |          |          |
| H ( 10)                     | 3.031983 | 3.786223 | 1.090465 |          |          |          |
| H ( 11)                     | 3.786223 | 3.614109 | 1.083995 | 1.837816 |          |          |
| C ( 12)                     | 2.213196 | 2.227252 | 1.500236 | 2.213196 | 2.227252 |          |
| H ( 13)                     | 3.066877 | 2.424586 | 2.161500 | 3.066877 | 2.424586 | 1.090280 |
| H ( 14)                     | 2.452759 | 2.985681 | 2.181025 | 2.452759 | 2.985681 | 1.095484 |
|                             | H ( 13)  |          |          |          |          |          |
| H ( 14)                     | 1.797214 |          |          |          |          |          |



## TS2-Ru

### Coordinates (Angstroms)

| ATOM  | X         | Y         | Z         |
|-------|-----------|-----------|-----------|
| 1 Cl  | 1.668141  | -1.544022 | 0.100509  |
| 2 C   | 3.275931  | 0.748322  | -0.148169 |
| 3 H   | 3.524394  | 0.326190  | -1.116667 |
| 4 H   | 3.634576  | 0.209208  | 0.720262  |
| 5 C   | 2.605591  | 1.940879  | -0.030078 |
| 6 H   | 2.583768  | 2.423968  | 0.942725  |
| 7 H   | 2.565634  | 2.600619  | -0.892523 |
| 8 C   | 0.530260  | 1.610962  | -0.181146 |
| 9 H   | 0.375015  | 2.309235  | 0.635411  |
| 10 H  | 0.469104  | 2.003648  | -1.193199 |
| 11 Ru | -0.219215 | -0.178418 | 0.021341  |
| 12 Cl | -1.022593 | -0.611813 | 2.062938  |
| 13 Cl | -1.060889 | -1.003170 | -1.884502 |
| 14 Cl | -2.058947 | 1.520339  | -0.137806 |

Point Group: C<sub>1</sub> Number of degrees of freedom: 36

Energy is -2052.565871521

### Distance Matrix (Angstroms)

|         | Cl ( 1)  | C ( 2)   | H ( 3)   | H ( 4)   | C ( 5)   | H ( 6)   |
|---------|----------|----------|----------|----------|----------|----------|
| C ( 2)  | 2.810991 |          |          |          |          |          |
| H ( 3)  | 2.902565 | 1.085319 |          |          |          |          |
| H ( 4)  | 2.706433 | 1.083255 | 1.843945 |          |          |          |
| C ( 5)  | 3.611150 | 1.373133 | 2.152230 | 2.149536 |          |          |
| H ( 6)  | 4.158442 | 2.115875 | 3.086510 | 2.461473 | 1.086369 |          |
| H ( 7)  | 4.355417 | 2.118865 | 2.478404 | 3.076127 | 1.086584 | 1.843820 |
| C ( 8)  | 3.365713 | 2.878184 | 3.389790 | 3.523383 | 2.106813 | 2.478095 |
| H ( 9)  | 4.099498 | 3.386112 | 4.113494 | 3.878408 | 2.356699 | 2.232979 |
| H ( 10) | 3.961986 | 3.247493 | 3.486333 | 4.111151 | 2.433385 | 3.034904 |
| Ru( 11) | 2.330934 | 3.619893 | 3.945161 | 3.935791 | 3.531797 | 3.934218 |
| Cl( 12) | 3.458351 | 5.021581 | 5.627152 | 4.915901 | 4.905169 | 4.845274 |
| Cl( 13) | 3.417658 | 4.989046 | 4.835451 | 5.504730 | 5.054640 | 5.746477 |
| Cl( 14) | 4.830971 | 5.390458 | 5.792914 | 5.905214 | 4.684695 | 4.851689 |
|         | H ( 7)   | C ( 8)   | H ( 9)   | H ( 10)  | Ru( 11)  | Cl( 12)  |
| C ( 8)  | 2.372388 |          |          |          |          |          |
| H ( 9)  | 2.686689 | 1.085564 |          |          |          |          |
| H ( 10) | 2.200504 | 1.087288 | 1.856354 |          |          |          |
| Ru( 11) | 4.039007 | 1.950537 | 2.630325 | 2.590425 |          |          |
| Cl( 12) | 5.650651 | 3.519659 | 3.538880 | 4.434888 | 2.236374 |          |
| Cl( 13) | 5.207973 | 3.502408 | 4.402704 | 3.443796 | 2.240729 | 3.966978 |
| Cl( 14) | 4.808675 | 2.591155 | 2.672899 | 2.781813 | 2.509126 | 3.234714 |
|         | Cl( 13)  |          |          |          |          |          |
| Cl( 14) | 3.227253 |          |          |          |          |          |

## pdt2-Ru

### Coordinates (Angstroms)

| ATOM  | X         | Y         | Z         |
|-------|-----------|-----------|-----------|
| 1 Cl  | -2.125068 | 0.110859  | 0.947689  |
| 2 C   | -2.872866 | 0.164224  | -0.719993 |
| 3 H   | -2.853667 | 1.212551  | -1.024957 |
| 4 H   | -3.904084 | -0.170139 | -0.599413 |
| 5 C   | -2.060879 | -0.735052 | -1.632793 |
| 6 H   | -2.140892 | -1.772257 | -1.289323 |
| 7 H   | -2.513801 | -0.695842 | -2.636838 |
| 8 C   | -0.597425 | -0.332011 | -1.742230 |
| 9 H   | 0.002644  | -1.077082 | -2.276974 |
| 10 H  | -0.449850 | 0.645427  | -2.229517 |
| 11 Ru | 0.443780  | 0.002817  | -0.009497 |
| 12 Cl | 0.641522  | -1.735495 | 1.410065  |
| 13 Cl | 2.509666  | -0.111368 | -0.959930 |
| 14 Cl | 0.481374  | 2.158650  | 0.662150  |

Point Group: C<sub>1</sub> Number of degrees of freedom: 36

Energy is -2052.663958050

### Distance Matrix (Angstroms)

|         | Cl ( 1)  | C ( 2)   | H ( 3)   | H ( 4)   | C ( 5)   | H ( 6)   |
|---------|----------|----------|----------|----------|----------|----------|
| C ( 2)  | 1.828445 |          |          |          |          |          |
| H ( 3)  | 2.374008 | 1.091953 |          |          |          |          |
| H ( 4)  | 2.374316 | 1.090756 | 1.787819 |          |          |          |
| C ( 5)  | 2.716353 | 1.516978 | 2.188866 | 2.187328 |          |          |
| H ( 6)  | 2.924140 | 2.147063 | 3.080100 | 2.480242 | 1.095522 |          |
| H ( 7)  | 3.694687 | 2.131416 | 2.521039 | 2.521974 | 1.102172 | 1.764519 |
| C ( 8)  | 3.124978 | 2.543393 | 2.826796 | 3.502317 | 1.521879 | 2.159103 |
| H ( 9)  | 4.041883 | 3.497655 | 3.868912 | 4.347330 | 2.188626 | 2.460381 |
| H ( 10) | 3.631357 | 2.895034 | 2.747896 | 3.905652 | 2.203909 | 3.096576 |
| Ru( 11) | 2.743512 | 3.395732 | 3.656196 | 4.391108 | 3.074550 | 3.386646 |
| Cl( 12) | 3.358100 | 4.527361 | 5.180411 | 5.210650 | 4.190805 | 3.876838 |
| Cl( 13) | 5.016888 | 5.394921 | 5.524702 | 6.424143 | 4.661718 | 4.949217 |
| Cl( 14) | 3.326939 | 4.139925 | 3.855377 | 5.123187 | 4.483673 | 5.112392 |
|         | H ( 7)   | C ( 8)   | H ( 9)   | H ( 10)  | Ru( 11)  | Cl( 12)  |
| C ( 8)  | 2.145972 |          |          |          |          |          |
| H ( 9)  | 2.570475 | 1.095977 |          |          |          |          |
| H ( 10) | 2.494957 | 1.102094 | 1.781583 |          |          |          |
| Ru( 11) | 4.017255 | 2.049044 | 2.549949 | 2.477904 |          |          |
| Cl( 12) | 5.235873 | 3.666295 | 3.799465 | 4.484020 | 2.252995 |          |
| Cl( 13) | 5.328120 | 3.211650 | 2.992051 | 3.308069 | 2.276894 | 3.427044 |
| Cl( 14) | 5.291741 | 3.626050 | 4.397453 | 3.393930 | 2.258348 | 3.968550 |
|         | Cl( 13)  |          |          |          |          |          |
| Cl( 14) | 3.449361 |          |          |          |          |          |

## **R1-Re/d**

| ATOM | Coordinates (Angstroms) |           |           |
|------|-------------------------|-----------|-----------|
|      | X                       | Y         | Z         |
| 1 Re | 0.000000                | 0.000000  | -0.061182 |
| 2 Cl | 0.000000                | -2.258026 | 0.496843  |
| 3 Cl | 2.310442                | 0.000000  | 0.051352  |
| 4 Cl | -2.310442               | 0.000000  | 0.051352  |
| 5 Cl | 0.000000                | 2.258026  | 0.496843  |
| 6 C  | 0.000000                | 0.000000  | -1.923290 |
| 7 H  | 0.930316                | 0.000000  | -2.493857 |
| 8 H  | -0.930316               | 0.000000  | -2.493857 |

Point Group: C<sub>2v</sub> Number of degrees of freedom: 7

Energy is -1959.257911679

| Distance Matrix (Angstroms) |          |          |          |          |          |          |
|-----------------------------|----------|----------|----------|----------|----------|----------|
| Re( 1)                      | Cl( 2)   | Cl( 3)   | Cl( 4)   | Cl( 5)   | C ( 6)   |          |
| Cl( 2)                      | 2.325956 |          |          |          |          |          |
| Cl( 3)                      | 2.313181 | 3.261179 |          |          |          |          |
| Cl( 4)                      | 2.313181 | 3.261179 | 4.620884 |          |          |          |
| Cl( 5)                      | 2.325956 | 4.516052 | 3.261179 | 3.261179 |          |          |
| C ( 6)                      | 1.862108 | 3.309943 | 3.039301 | 3.039301 | 3.309943 |          |
| H ( 7)                      | 2.604495 | 3.861146 | 2.895313 | 4.120752 | 3.861146 | 1.091345 |
| H ( 8)                      | 2.604495 | 3.861146 | 4.120752 | 2.895313 | 3.861146 | 1.091345 |
| H ( 7)                      |          |          |          |          |          |          |
| H ( 8)                      | 1.860631 |          |          |          |          |          |

## **R2-Re/d**

| ATOM | Coordinates (Angstroms) |           |           |
|------|-------------------------|-----------|-----------|
|      | X                       | Y         | Z         |
| 1 Re | 0.216207                | -0.001244 | -0.007826 |
| 2 Cl | -0.034607               | 1.900636  | 1.199406  |
| 3 Cl | 2.236638                | 0.002424  | -0.997137 |
| 4 Cl | -2.588511               | 0.001225  | -0.555757 |
| 5 Cl | -0.033453               | -1.910521 | 1.188533  |
| 6 C  | -1.091038               | 0.005040  | -1.580740 |
| 7 H  | -1.088018               | -0.895709 | -2.203211 |
| 8 H  | -1.088047               | 0.910771  | -2.195790 |

Point Group: C<sub>1</sub> Number of degrees of freedom: 18

Energy is -1959.249696116

| Distance Matrix (Angstroms) |          |          |          |          |          |          |
|-----------------------------|----------|----------|----------|----------|----------|----------|
| Re( 1)                      | Cl( 2)   | Cl( 3)   | Cl( 4)   | Cl( 5)   | C ( 6)   |          |
| Cl( 2)                      | 2.266598 |          |          |          |          |          |
| Cl( 3)                      | 2.249643 | 3.685996 |          |          |          |          |
| Cl( 4)                      | 2.857739 | 3.634664 | 4.845295 |          |          |          |
| Cl( 5)                      | 2.266924 | 3.811173 | 3.686438 | 3.636707 |          |          |
| C ( 6)                      | 2.045235 | 3.526832 | 3.378466 | 1.814670 | 3.529410 |          |
| H ( 7)                      | 2.705695 | 4.528468 | 3.648917 | 2.402098 | 3.694033 | 1.094910 |
| H ( 8)                      | 2.705556 | 3.690112 | 3.649027 | 2.401743 | 4.530508 | 1.094826 |
| H ( 7)                      |          |          |          |          |          |          |
| H ( 8)                      | 1.806495 |          |          |          |          |          |

## p1-Re/d

Coordinates (Angstroms)

| ATOM | X         | Y         | Z         |
|------|-----------|-----------|-----------|
| 1 Re | -0.161368 | 0.000789  | 0.057225  |
| 2 C  | 1.369564  | -0.013087 | -1.385089 |
| 3 H  | 1.470605  | 0.905288  | -1.957842 |
| 4 H  | 1.455759  | -0.934737 | -1.955192 |
| 5 Cl | 2.563667  | -0.020691 | -0.035368 |
| 6 Cl | -2.383825 | 0.025874  | -0.283750 |
| 7 Cl | -0.099269 | 2.380902  | -0.344958 |
| 8 Cl | -0.149898 | -2.379518 | -0.347025 |
| 9 C  | 0.074938  | -0.717765 | 2.071777  |
| 10 H | 0.989026  | -1.289374 | 2.200472  |
| 11 H | -0.827410 | -1.256680 | 2.355075  |
| 12 C | 0.089432  | 0.712460  | 2.071253  |
| 13 H | 1.014931  | 1.265315  | 2.199557  |
| 14 H | -0.801749 | 1.269878  | 2.352982  |

Point Group: C<sub>1</sub> Number of degrees of freedom: 36

Energy is -2037.871496373

Distance Matrix (Angstroms)

|         | Re( 1)   | C ( 2)   | H ( 3)   | H ( 4)   | Cl( 5)   | Cl( 6)   |
|---------|----------|----------|----------|----------|----------|----------|
| C ( 2)  | 2.103382 |          |          |          |          |          |
| H ( 3)  | 2.746260 | 1.087045 |          |          |          |          |
| H ( 4)  | 2.745930 | 1.087146 | 1.840087 |          |          |          |
| Cl( 5)  | 2.726692 | 1.802134 | 2.397525 | 2.397637 |          |          |
| Cl( 6)  | 2.248602 | 3.911828 | 4.293318 | 4.296383 | 4.953943 |          |
| Cl( 7)  | 2.414652 | 2.995083 | 2.691344 | 4.000554 | 3.599267 | 3.281631 |
| Cl( 8)  | 2.414417 | 2.997722 | 4.001338 | 2.692903 | 3.608965 | 3.283344 |
| C ( 9)  | 2.151878 | 3.757999 | 4.562895 | 4.262655 | 3.334629 | 3.485257 |
| H ( 10) | 2.753441 | 3.824914 | 4.726524 | 4.196803 | 3.014636 | 4.390599 |
| H ( 11) | 2.702769 | 4.512433 | 5.343803 | 4.888243 | 4.329122 | 3.321260 |
| C ( 12) | 2.150741 | 3.756522 | 4.263617 | 4.559865 | 3.331247 | 3.483452 |
| H ( 13) | 2.751780 | 3.822272 | 4.197764 | 4.721917 | 3.007870 | 4.388003 |
| H ( 14) | 2.700218 | 4.509299 | 4.886688 | 5.340135 | 4.323866 | 3.317057 |
|         | Cl( 7)   | Cl( 8)   | C ( 9)   | H ( 10)  | H ( 11)  | C ( 12)  |
| Cl( 8)  | 4.760689 |          |          |          |          |          |
| C ( 9)  | 3.933534 | 2.943225 |          |          |          |          |
| H ( 10) | 4.597229 | 2.995881 | 1.085752 |          |          |          |
| H ( 11) | 4.588286 | 3.003520 | 1.088540 | 1.823297 |          |          |
| C ( 12) | 2.942343 | 3.932642 | 1.430298 | 2.198478 | 2.190585 |          |
| H ( 13) | 2.993414 | 4.596380 | 2.198300 | 2.554820 | 3.127118 | 1.085661 |
| H ( 14) | 3.001122 | 4.586179 | 2.190521 | 3.127284 | 2.526689 | 1.088251 |
|         | H ( 13)  |          |          |          |          |          |
| H ( 14) | 1.823153 |          |          |          |          |          |

## TS1-Re/d

| ATOM | Coordinates (Angstroms) |           |           |
|------|-------------------------|-----------|-----------|
|      | X                       | Y         | Z         |
| 1 Re | -0.053195               | -0.021147 | 0.063425  |
| 2 Cl | 1.318299                | 0.460896  | -1.845238 |
| 3 Cl | 2.078903                | -0.861159 | 0.900286  |
| 4 Cl | 0.272924                | 2.230510  | 0.583297  |
| 5 Cl | -2.271865               | 0.449873  | -0.439153 |
| 6 C  | -0.556697               | -0.834743 | 1.750379  |
| 7 H  | 0.068392                | -1.385067 | 2.445562  |
| 8 H  | -1.581389               | -0.658862 | 2.089330  |
| 9 C  | -0.346429               | -1.922083 | -1.120859 |
| 10 H | 0.638401                | -2.216385 | -1.466218 |
| 11 H | -1.080870               | -1.694533 | -1.886607 |
| 12 C | -0.782828               | -2.372789 | 0.141545  |
| 13 H | -1.846472               | -2.435503 | 0.350065  |
| 14 H | -0.111665               | -2.984692 | 0.735757  |

Point Group: C<sub>1</sub> Number of degrees of freedom: 36

Energy is -2037.841240801

| Distance Matrix (Angstroms) |          |          |          |          |          |          |
|-----------------------------|----------|----------|----------|----------|----------|----------|
|                             | Re ( 1)  | Cl( 2)   | Cl( 3)   | Cl( 4)   | Cl( 5)   | C ( 6)   |
| Cl( 2)                      | 2.399240 |          |          |          |          |          |
| Cl( 3)                      | 2.439631 | 3.140740 |          |          |          |          |
| Cl( 4)                      | 2.333791 | 3.181528 | 3.594504 |          |          |          |
| Cl( 5)                      | 2.323132 | 3.855707 | 4.737308 | 3.269866 |          |          |
| C ( 6)                      | 1.939398 | 4.257082 | 2.769430 | 3.383212 | 3.063672 |          |
| H ( 7)                      | 2.747661 | 4.835371 | 2.589307 | 4.072133 | 4.143114 | 1.084838 |
| H ( 8)                      | 2.616553 | 5.014267 | 3.853893 | 3.749011 | 2.845922 | 1.093534 |
| C ( 9)                      | 2.258776 | 2.995770 | 3.330590 | 4.531200 | 3.130208 | 3.077422 |
| H ( 10)                     | 2.763545 | 2.788145 | 3.084157 | 4.910087 | 4.078412 | 3.699147 |
| H ( 11)                     | 2.767482 | 3.225461 | 4.294817 | 4.831060 | 2.848170 | 3.773812 |
| C ( 12)                     | 2.463470 | 4.048681 | 3.324187 | 4.743429 | 3.243742 | 2.237201 |
| H ( 13)                     | 3.021112 | 4.819155 | 4.264959 | 5.130099 | 3.021460 | 2.487335 |
| H ( 14)                     | 3.039416 | 4.536344 | 3.055332 | 5.231585 | 4.224111 | 2.418635 |
| H ( 7)                      |          | H ( 8)   | C ( 9)   | H ( 10)  | H ( 11)  | C ( 12)  |
| H ( 8)                      | 1.837404 |          |          |          |          |          |
| C ( 9)                      | 3.630402 | 3.664174 |          |          |          |          |
| H ( 10)                     | 4.039557 | 4.471607 | 1.084333 |          |          |          |
| H ( 11)                     | 4.492689 | 4.138986 | 1.085150 | 1.845250 |          |          |
| C ( 12)                     | 2.647388 | 2.714611 | 1.409697 | 2.151571 | 2.159227 |          |
| H ( 13)                     | 3.026752 | 2.500354 | 2.162717 | 3.085691 | 2.477475 | 1.085704 |
| H ( 14)                     | 2.348330 | 3.066225 | 2.152040 | 2.449814 | 3.079068 | 1.085345 |
| H ( 13)                     |          |          |          |          |          |          |
| H ( 14)                     | 1.860087 |          |          |          |          |          |

## pdt1-Re/d

| ATOM | Coordinates (Angstroms) |           |           |
|------|-------------------------|-----------|-----------|
|      | X                       | Y         | Z         |
| 1 Re | -0.165975               | -0.118197 | 0.000000  |
| 2 Cl | -0.508249               | -0.818881 | -2.189850 |
| 3 Cl | -2.259478               | 0.863206  | 0.000000  |
| 4 Cl | -0.508249               | -0.818881 | 2.189850  |
| 5 Cl | 1.910840                | -1.140394 | 0.000000  |
| 6 C  | 0.715023                | 1.576127  | 1.142566  |
| 7 H  | -0.141732               | 2.095373  | 1.573533  |
| 8 H  | 1.350802                | 1.163428  | 1.924515  |
| 9 C  | 0.715023                | 1.576127  | -1.142566 |
| 10 H | -0.141732               | 2.095373  | -1.573533 |
| 11 H | 1.350802                | 1.163428  | -1.924515 |
| 12 C | 1.402604                | 2.292627  | 0.000000  |
| 13 H | 2.479929                | 2.103829  | 0.000000  |
| 14 H | 1.239261                | 3.377564  | 0.000000  |

Point Group: C<sub>s</sub> Number of degrees of freedom: 21

Energy is -2037.867250341

| Distance Matrix (Angstroms) |          |          |          |          |          |          |
|-----------------------------|----------|----------|----------|----------|----------|----------|
|                             | Re( 1)   | Cl( 2)   | Cl( 3)   | Cl( 4)   | Cl( 5)   | C ( 6)   |
| Cl( 2)                      | 2.324555 |          |          |          |          |          |
| Cl( 3)                      | 2.312122 | 3.269811 |          |          |          |          |
| Cl( 4)                      | 2.324555 | 4.379700 | 3.269811 |          |          |          |
| Cl( 5)                      | 2.314746 | 3.278842 | 4.626658 | 3.278842 |          |          |
| C ( 6)                      | 2.225387 | 4.282226 | 3.265175 | 2.886047 | 3.180397 |          |
| H ( 7)                      | 2.715968 | 4.773915 | 2.911888 | 3.001176 | 4.142371 | 1.090585 |
| H ( 8)                      | 2.765308 | 4.930884 | 4.102196 | 2.730572 | 3.053685 | 1.089027 |
| C ( 9)                      | 2.225387 | 2.886047 | 3.265175 | 4.282226 | 3.180397 | 2.285132 |
| H ( 10)                     | 2.715968 | 3.001176 | 2.911888 | 4.773915 | 4.142371 | 2.894968 |
| H ( 11)                     | 2.765308 | 2.730572 | 4.102196 | 4.930884 | 3.053685 | 3.159354 |
| C ( 12)                     | 2.876197 | 4.257733 | 3.931169 | 4.257733 | 3.470437 | 1.513802 |
| H ( 13)                     | 3.455171 | 4.718781 | 4.899095 | 4.718781 | 3.293758 | 2.167677 |
| H ( 14)                     | 3.767629 | 5.045729 | 4.308500 | 5.045729 | 4.567598 | 2.196692 |
| H ( 7)                      |          | H ( 8)   | C ( 9)   | H ( 10)  | H ( 11)  | C ( 12)  |
| H ( 8)                      | 1.794259 |          |          |          |          |          |
| C ( 9)                      | 2.894968 | 3.159354 |          |          |          |          |
| H ( 10)                     | 3.147066 | 3.915675 | 1.090585 |          |          |          |
| H ( 11)                     | 3.915675 | 3.849029 | 1.089027 | 1.794259 |          |          |
| C ( 12)                     | 2.213569 | 2.231934 | 1.513802 | 2.213569 | 2.231934 |          |
| H ( 13)                     | 3.057643 | 2.421372 | 2.167677 | 3.057643 | 2.421372 | 1.093743 |
| H ( 14)                     | 2.455027 | 2.935744 | 2.196692 | 2.455027 | 2.935744 | 1.097164 |
| H ( 13)                     |          |          |          |          |          |          |
| H ( 14)                     | 1.778105 |          |          |          |          |          |

## **TS2-Re/d**

| ATOM  | Coordinates (Angstroms) |           |           |
|-------|-------------------------|-----------|-----------|
|       | X                       | Y         | Z         |
| 1 Cl  | -1.528037               | -1.408847 | 0.344724  |
| 2 C   | -3.514158               | 0.309474  | -0.189116 |
| 3 H   | -3.834278               | 0.149631  | 0.834989  |
| 4 H   | -3.758579               | -0.472052 | -0.899031 |
| 5 C   | -2.966762               | 1.501584  | -0.594364 |
| 6 H   | -2.917053               | 1.713359  | -1.658858 |
| 7 H   | -3.057375               | 2.366776  | 0.056489  |
| 8 C   | -0.818551               | 1.551490  | -0.359018 |
| 9 H   | -0.699641               | 2.073152  | -1.310221 |
| 10 H  | -0.856962               | 2.210555  | 0.513935  |
| 11 Re | 0.311201                | 0.044647  | -0.065766 |
| 12 Cl | 2.331586                | 1.248880  | -0.418409 |
| 13 Cl | 0.707903                | -1.121084 | -1.964190 |
| 14 Cl | 0.868441                | -0.228731 | 2.115804  |

Point Group: C<sub>1</sub> Number of degrees of freedom: 36

Energy is -2037.834780161

| Distance Matrix (Angstroms) |          |          |          |          |          |          |
|-----------------------------|----------|----------|----------|----------|----------|----------|
|                             | Cl ( 1)  | C ( 2)   | H ( 3)   | H ( 4)   | C ( 5)   | H ( 6)   |
| C ( 2)                      | 2.679979 |          |          |          |          |          |
| H ( 3)                      | 2.826299 | 1.084812 |          |          |          |          |
| H ( 4)                      | 2.720263 | 1.083745 | 1.843650 |          |          |          |
| C ( 5)                      | 3.379708 | 1.372952 | 2.150213 | 2.148263 |          |          |
| H ( 6)                      | 3.961298 | 2.118389 | 3.083151 | 2.462016 | 1.086493 |          |
| H ( 7)                      | 4.083783 | 2.121666 | 2.474949 | 3.076304 | 1.086451 | 1.840939 |
| C ( 8)                      | 3.124454 | 2.972838 | 3.533479 | 3.609722 | 2.161640 | 2.473761 |
| H ( 9)                      | 3.943272 | 3.505559 | 4.257677 | 4.000530 | 2.445195 | 2.273305 |
| H ( 10)                     | 3.684975 | 3.342017 | 3.635230 | 4.196693 | 2.486408 | 3.035162 |
| Re( 11)                     | 2.379903 | 3.836498 | 4.243511 | 4.186217 | 3.625896 | 3.967892 |
| Cl( 12)                     | 4.747902 | 5.925182 | 6.387272 | 6.346866 | 5.307288 | 5.413193 |
| Cl( 13)                     | 3.226968 | 4.798248 | 5.484664 | 4.637377 | 4.717836 | 4.611681 |
| Cl( 14)                     | 3.205075 | 4.980913 | 4.888683 | 5.527906 | 5.004776 | 5.687684 |
|                             | H ( 7)   | C ( 8)   | H ( 9)   | H ( 10)  | Re( 11)  | Cl( 12)  |
| C ( 8)                      | 2.418609 |          |          |          |          |          |
| H ( 9)                      | 2.740989 | 1.091356 |          |          |          |          |
| H ( 10)                     | 2.252883 | 1.094481 | 1.836076 |          |          |          |
| Re( 11)                     | 4.093231 | 1.906020 | 2.585595 | 2.528204 |          |          |
| Cl( 12)                     | 5.524140 | 3.165196 | 3.265438 | 3.458456 | 2.378338 |          |
| Cl( 13)                     | 5.515943 | 3.471209 | 3.551337 | 4.437311 | 2.262811 | 3.262287 |
| Cl( 14)                     | 5.137068 | 3.484232 | 4.415336 | 3.390150 | 2.268149 | 3.278165 |
|                             | Cl( 13)  |          |          |          |          |          |
| Cl( 14)                     | 4.179524 |          |          |          |          |          |

## pdt2-Re/d

| ATOM  | Coordinates (Angstroms) |           |           |
|-------|-------------------------|-----------|-----------|
|       | X                       | Y         | Z         |
| 1 Cl  | -1.891273               | 0.225139  | 0.848566  |
| 2 C   | -2.615466               | 0.252653  | -0.852927 |
| 3 H   | -2.611815               | 1.304398  | -1.145027 |
| 4 H   | -3.638399               | -0.104921 | -0.731273 |
| 5 C   | -1.760918               | -0.622786 | -1.746415 |
| 6 H   | -1.855968               | -1.667523 | -1.430443 |
| 7 H   | -2.173940               | -0.553668 | -2.764396 |
| 8 C   | -0.282703               | -0.210340 | -1.756875 |
| 9 H   | 0.314764                | -0.930293 | -2.329940 |
| 10 H  | -0.143964               | 0.771087  | -2.238968 |
| 11 Re | 0.644585                | 0.021838  | 0.094531  |
| 12 Cl | 2.813258                | -0.144153 | -0.648516 |
| 13 Cl | 0.543800                | -2.103777 | 0.951041  |
| 14 Cl | 0.729785                | 2.265953  | 0.562791  |

Point Group: C<sub>1</sub> Number of degrees of freedom: 36

Energy is -2037.889616910

| Distance Matrix (Angstroms) |          |          |          |          |          |          |
|-----------------------------|----------|----------|----------|----------|----------|----------|
|                             | Cl ( 1)  | C ( 2)   | H ( 3)   | H ( 4)   | C ( 5)   | H ( 6)   |
| C ( 2)                      | 1.849402 |          |          |          |          |          |
| H ( 3)                      | 2.378737 | 1.091560 |          |          |          |          |
| H ( 4)                      | 2.378504 | 1.090437 | 1.791995 |          |          |          |
| C ( 5)                      | 2.733111 | 1.514914 | 2.190829 | 2.196277 |          |          |
| H ( 6)                      | 2.962651 | 2.144163 | 3.079786 | 2.471361 | 1.095604 |          |
| H ( 7)                      | 3.706742 | 2.121040 | 2.503298 | 2.545506 | 1.100749 | 1.766694 |
| C ( 8)                      | 3.092809 | 2.544261 | 2.844917 | 3.510508 | 1.534712 | 2.169124 |
| H ( 9)                      | 4.037886 | 3.488147 | 3.868168 | 4.343325 | 2.177961 | 2.462656 |
| H ( 10)                     | 3.589431 | 2.880660 | 2.751621 | 3.905331 | 2.190897 | 3.087310 |
| Re( 11)                     | 2.653390 | 3.402776 | 3.712897 | 4.363712 | 3.096945 | 3.381162 |
| Cl( 12)                     | 4.950782 | 5.447043 | 5.637041 | 6.452307 | 4.728378 | 4.973302 |
| Cl( 13)                     | 3.371043 | 4.334515 | 5.095788 | 4.931166 | 3.844649 | 3.408911 |
| Cl( 14)                     | 3.334147 | 4.153112 | 3.873954 | 5.135823 | 4.458794 | 5.111882 |
|                             | H ( 7)   | C ( 8)   | H ( 9)   | H ( 10)  | Re( 11)  | Cl( 12)  |
| C ( 8)                      | 2.170196 |          |          |          |          |          |
| H ( 9)                      | 2.554260 | 1.097134 |          |          |          |          |
| H ( 10)                     | 2.480293 | 1.102207 | 1.764483 |          |          |          |
| Re( 11)                     | 4.055707 | 2.083621 | 2.625528 | 2.574569 |          |          |
| Cl( 12)                     | 5.432936 | 3.289045 | 3.112503 | 3.480282 | 2.298437 |          |
| Cl( 13)                     | 4.857306 | 3.406027 | 3.492042 | 4.349025 | 2.293906 | 3.398404 |
| Cl( 14)                     | 5.239471 | 3.540905 | 4.330834 | 3.293618 | 2.294031 | 3.408333 |
|                             | Cl( 13)  |          |          |          |          |          |
| Cl( 14)                     | 4.390885 |          |          |          |          |          |
